1 **Title**

2 **Ribosomal RNA operons define a central functional compartment in the *Streptomyces***  
3 **chromosome**

4  
5 **Authors**

6 Jean-Noël Lorenzi<sup>1,3</sup>, Annabelle Thibessard<sup>2</sup>, Virginia S. Lioy<sup>1</sup>, Frédéric Boccard<sup>1</sup>, Pierre  
7 Leblond<sup>2</sup>, Jean-Luc Pernodet<sup>1</sup>, Stéphanie Bury-Moné<sup>1,\*</sup>

8  
9 <sup>1</sup>Université Paris-Saclay, CEA, CNRS, Institute for Integrative Biology of the Cell (I2BC),  
10 91198, Gif-sur-Yvette, France.

11 <sup>2</sup>Université de Lorraine, INRAE, DynAMic, F-54000 Nancy, France

12 \*Address correspondence to: [stephanie.bury-mone@i2bc.paris-saclay.fr](mailto:stephanie.bury-mone@i2bc.paris-saclay.fr)

13 <sup>3</sup>Present address: CNRS UMR7592, Institut Jacques Monod, Université Paris Diderot, Paris,  
14 France ; Collège de France, CNRS, INSERM, PSL Research University, Paris, France

15  
16 **Running Title:** Ribosomal RNA operons and compartmentalization

17  
18 **Keywords:** Ribosomal RNA operons; Genome dynamics; Genetic compartmentalization;  
19 Core genome; Evolution; *Streptomyces*

20

## 21 **Abstract**

22 *Streptomyces* are prolific producers of specialized metabolites with applications in medicine  
23 and agriculture. These bacteria possess a large linear chromosome genetically  
24 compartmentalized: core genes are grouped in the central part, while terminal regions are  
25 populated by poorly conserved genes and define the chromosomal arms. In exponentially  
26 growing cells, chromosome conformation capture unveiled sharp boundaries formed by  
27 ribosomal RNA (*rrn*) operons that segment the chromosome into multiple domains. The first  
28 and last *rrn* operons delimit the highly expressed central compartment and the rather  
29 transcriptionally silent terminal compartments. Here we further explore the link between the  
30 genetic distribution of *rrn* operons and *Streptomyces* genomic compartmentalization. A large  
31 panel of genomes of species representative of the genus diversity revealed that *rrn* operons  
32 and core genes form a central skeleton, the former being identifiable from their core gene  
33 environment. We implemented a new nomenclature for *Streptomyces* genomes and trace  
34 their *rrn*-based evolutionary history. Remarkably, *rrn* operons are close to pericentric  
35 inversions. Moreover, the central compartment delimited by *rrn* operons has a very dense,  
36 nearly invariant core gene content. Finally, this compartment harbors genes with the highest  
37 expression levels, regardless of gene persistence and distance to the origin of replication.  
38 Our results highlight that *rrn* operons define the structural boundaries of a central functional  
39 compartment prone to transcription in *Streptomyces*.

40

## 41 **Introduction**

42 *Streptomyces* are bacteria of great biotechnological interest due to the production of  
43 antibiotics and many other bioactive compounds (Berdy 2012). Remarkably for a bacterium,  
44 they have a linear chromosome and terminal inverted repeats (TIRs) capped by telomere-like  
45 sequences. Their genome is amongst the largest in bacteria (6-15 Mb), with an extreme GC  
46 content (circa 72%). In addition, the *Streptomyces* chromosome presents a partition, termed  
47 'genetic compartmentalization', into a core region harboring genes shared by all  
48 *Streptomyces* and more variable extremities or 'arms' enriched in specialized metabolite

49 biosynthetic gene clusters (Redenbach et al. 1996; Omura et al. 2001; Karoonuthaisiri et al.  
50 2005; Ikeda et al. 2003; Choulet et al. 2006; Bentley et al. 2002; Lorenzi et al. 2021; Virginia  
51 S. Liroy et al. 2021). Consistently, DNA rearrangements and recombination events are more  
52 frequently fixed in the terminal arms than in the central region (Choulet et al. 2006; Fischer et  
53 al. 1998; Hoff et al. 2018; Tidjani et al. 2019; Hopwood 2006; Zhang et al. 2020). It has been  
54 proposed that strong evolutionary constraints shaped the distribution of genes along the  
55 chromosome owing to their potential benefit at the individual or population level (Lorenzi et  
56 al. 2021): genes encoding ‘private goods’ essential for vegetative growth are maintained in  
57 the central part of the genome, whereas social genes encoding ‘public goods’ of strong  
58 adaptive value for the colony (e.g. antibiotics) are located in the variable part of the genome,  
59 which may favor their rapid diversification. The mechanisms that govern the structure and  
60 function of these compartmentalized genomes remain mostly unknown.

61 We recently demonstrated that the genetic compartmentalization of *Streptomyces*  
62 *ambofaciens* ATCC 23877 correlates with chromosome architecture and gene expression in  
63 exponential phase (Virginia S. Liroy et al. 2021). During vegetative growth, the distal  
64 ribosomal RNA (*rrn*) operons delimit a highly structured and expressed region termed ‘central  
65 compartment’, presenting structural features distinct from those of the terminal compartments  
66 which are almost transcriptionally quiescent (Virginia S. Liroy et al. 2021). This led us to  
67 propose that these distal *rrn* operons may constitute some kind of barrier contributing to the  
68 evolution of *Streptomyces* genomes towards a compartmentalized organization (Virginia S.  
69 Liroy et al. 2021).

70 The number of *rrn* copies is thought to be a determinant of bacterial fitness, with the  
71 optimal number depending on the environmental and biological context in which the species  
72 evolve (Stevenson et Schmidt 2004; Roller, Stoddard, et Schmidt 2016; Espejo et Plaza  
73 2018; Fleurier et al. 2022). Although 16S RNA sequences are the classical ‘chronometer’ for  
74 phylogenetic classification, their impact on genome evolution *per se* has rarely been  
75 considered (Espejo et Plaza 2018). Interestingly, the *rrn* operons, including 16S, 23S, 5S and  
76 internal transcribed spacer regions, coincide with sharp boundaries in the chromosome 3D-

77 organization of bacteria with linear (Virginia S. Lioy et al. 2021) as well as circular (V. S. Lioy  
78 et al. 2018; Le et Laub 2016; Böhm et al. 2020; Marbouty et al. 2015; Wang et al. 2015)  
79 genomes. The formation of these boundaries correlates with a very high level of  
80 transcription, but does not require translation (Le et Laub 2016). Moreover, RNA polymerase  
81 is spatially organized into dense clusters engaged in ribosomal RNA synthesis when bacteria  
82 are grown in rich medium (D. J. Jin et Cabrera 2006; Cabrera et Jin 2006; Mata Martin et al.  
83 2018; Weng et al. 2019). It has been proposed that *rrn* operons might form a bacterial  
84 equivalent of the nucleolus (Gaal et al. 2016), although these results remain controversial  
85 (Mata Martin et al. 2018). Altogether, these observations open the possibility that the *rrn*  
86 operons could play a role in genome evolution by coupling transcription and genome spatial  
87 conformation.

88         Guided by this hypothesis, we took advantage of the large number of sequenced  
89 *Streptomyces* genomes to explore the correlation between *rrn* operon dynamics (number,  
90 position) and chromosome organization in a panel of species representative of *Streptomyces*  
91 diversity. We notably observed that *rrn* operons coevolved with the core region and can be  
92 identified from their core gene environment. We set-up an *rrn*-based nomenclature for  
93 *Streptomyces* genome organization that we used to trace its evolutionary history. Pericentric  
94 recombination frequently occurred at the vicinity of *rrn* operons located close to the origin of  
95 replication. Moreover, we observed that the most external *rrn* operons, designated 'distal *rrn*  
96 operons', delimit the central compartment, whose size and content are highly correlated with  
97 the core genome dynamics. Genes within this central compartment are expressed at a higher  
98 level than in the terminal compartments, regardless of gene persistence and the distance to  
99 the origin of replication. Altogether, our results highlight that distal *rrn* operons may be  
100 considered as 'structural limits' that delineate a functional compartment in the linear genome  
101 of *Streptomyces*.

## 102 **Results**

### 103 **New nomenclature of *Streptomyces* genomes based on *rrn* operons and *dnaA* gene** 104 **orientation**

105 We first characterized the organization of *rrn* operons in 127 *Streptomyces* genomes  
106 from a previously characterized panel of *Streptomyces* species representative of the genus  
107 diversity (Lorenzi et al. 2021; Virginia S. Lioy et al. 2021) (**Supplemental Table S1**). In this  
108 panel, most genomes (>85 %) share an average nucleotide identity based on BLAST+ (ANIb)  
109 lower than 95 %, a threshold used to distinguish species (Richter et Rosselló-Móra 2009)  
110 (**Supplemental Table S2**). We included several strains for eight species (e.g. *S.*  
111 *ambofaciens*, *Streptomyces venezuelae*) to access intra-species evolution and include  
112 strains for which –omics data were available for further analyses. We re-annotated all  
113 genomes and detected orthologous genes, as previously described (Lorenzi et al. 2021).  
114 This allowed the identification of 1,017 ortholog genes associated with best reciprocal  
115 matches between coding sequences present in all 127 genomes, further defined as the ‘core  
116 genome’. Interestingly, 943 of these genes (92.7 %) are included in the soft-core recently  
117 identified on a partially overlapping panel of *Streptomyces* genomes by Caicedo-Montoya *et*  
118 *al.* (Roary method) (Caicedo-Montoya, Manzo-Ruiz, et Ríos-Esteba 2021). We used the  
119 position of the most external genes of the core genome as limits between the ‘arms’ and the  
120 ‘core region’ (that therefore includes all the core genes and some non-core genes, **Fig. 1A**).

121 Most *Streptomyces* genomes from our panel (70.1 %) harbor six *rrn* operons  
122 encoding all three 16S, 23S, 5S ribosomal RNAs (**Fig. 1B**). About a quarter of genomes  
123 (24.4 %) contain seven complete *rrn* operons, eight complete operons being quite  
124 exceptional (only *Streptomyces hundertgensis* BH38). These results are in accordance with  
125 the number of 16S *rrn* genes per strain reported in the *rrnDB* database (Roller, Stoddard, et  
126 Schmidt 2016) in a panel of 265 *Streptomyces* genomes (74.0 % and 22.3 % with six and  
127 seven 16S *rrn* genes, respectively - <https://rrndb.umms.med.umich.edu/>, version 5.7). Thus,  
128 sampling biases seem negligible when comparing data from our panel and an independent  
129 set of genomes.

130 Pairwise comparison of core genomes revealed that synteny of core genes is strong  
131 between all strains, highlighting a ‘core skeleton’ with a rather stable core gene order in  
132 *Streptomyces* (**Supplemental Fig. S1**). In the middle of the genome, we confirmed the  
133 existence of a region at the origin of replication in which core gene synteny is perfectly  
134 conserved between all strains, as previously described for a smaller set of strains (Algora-  
135 Gallardo et al. 2021). We then determined a consensus order of core genes by assigning  
136 them their most frequent rank in a panel of genomes representative of the most frequent  
137 global core skeleton organization. Interestingly, five core genomes of the panel (e.g.  
138 *Streptomyces viridosporus* T7A ATCC 39115) present exactly this consensus organization,  
139 and twelve (e.g. *S. ambofaciens* both strains in the clade 1, *Streptomyces ficellus* NRRL  
140 8067 in the clade 2) differ only by the order of 2 genes of the core genome owing to a local  
141 inversion (**Table S3**).

142 In accordance with the existence of a core skeleton, we noticed that six *rrn* operons  
143 almost always have the same core gene environment in all the strains (**Fig. 1A**). These six  
144 *rrn* core gene neighborhoods, hereinafter referred to as ‘canonical’ and designated from ‘A’  
145 to ‘F’ in capital letters (**Supplemental Fig. S2**), are exactly conserved in 87.4 to 99.2 % of  
146 the genomes (**Fig. 1C**). In this nomenclature, the same letter is kept when at least one core  
147 gene is in common between two *rrn* genetic environments. An asterisk (**Supplemental Fig.**  
148 **S1, Supplemental Table S1**) has been added to indicate an identical environment but in  
149 reverse orientation to that shown in the **Supplemental Figure S2**. We also identified  
150 recombination between ‘D’ and ‘E’ *rrn* operons, leading to [d/e] hybrid core gene  
151 environments in some strains (**Fig. 1A**). On the contrary, the 7<sup>th</sup> and 8<sup>th</sup> *rrn* operons (when  
152 present) can be located in various core gene environments, named ‘g’ through ‘k’ in lower  
153 case with a number, to indicate their non-canonical nature (**Fig. 1C**). Based on these  
154 observations, we proposed that the ancestor of all *Streptomyces* had 6 *rrn* operons, the 7<sup>th</sup>  
155 and 8<sup>th</sup> *rrn* operons emerging from *rrn* operon duplication/acquisition in the vicinity of a  
156 canonical *rrn* operon (e.g. ‘e2’ *rrn* operon in *S. venezuelae* ATCC 10712) or at an ectopic  
157 position (e.g. ‘k1’ *rrn* operon in *Streptomyces albidoflavus* strains and *S. hundertgensis*

158 BH38). Accordingly, the presence of only five *rrn* operons [*Streptomyces asterosporus*  
 159 (synonym: *calvus*) DSM 41452] likely corresponds to the loss of an *rrn* operon.

160 Each genome was thus classified according to the orientation of the *rrn* genetic  
 161 environments and the *dnaA* gene (as a proxy of the origin of replication orientation)  
 162 (Supplemental Table S1).

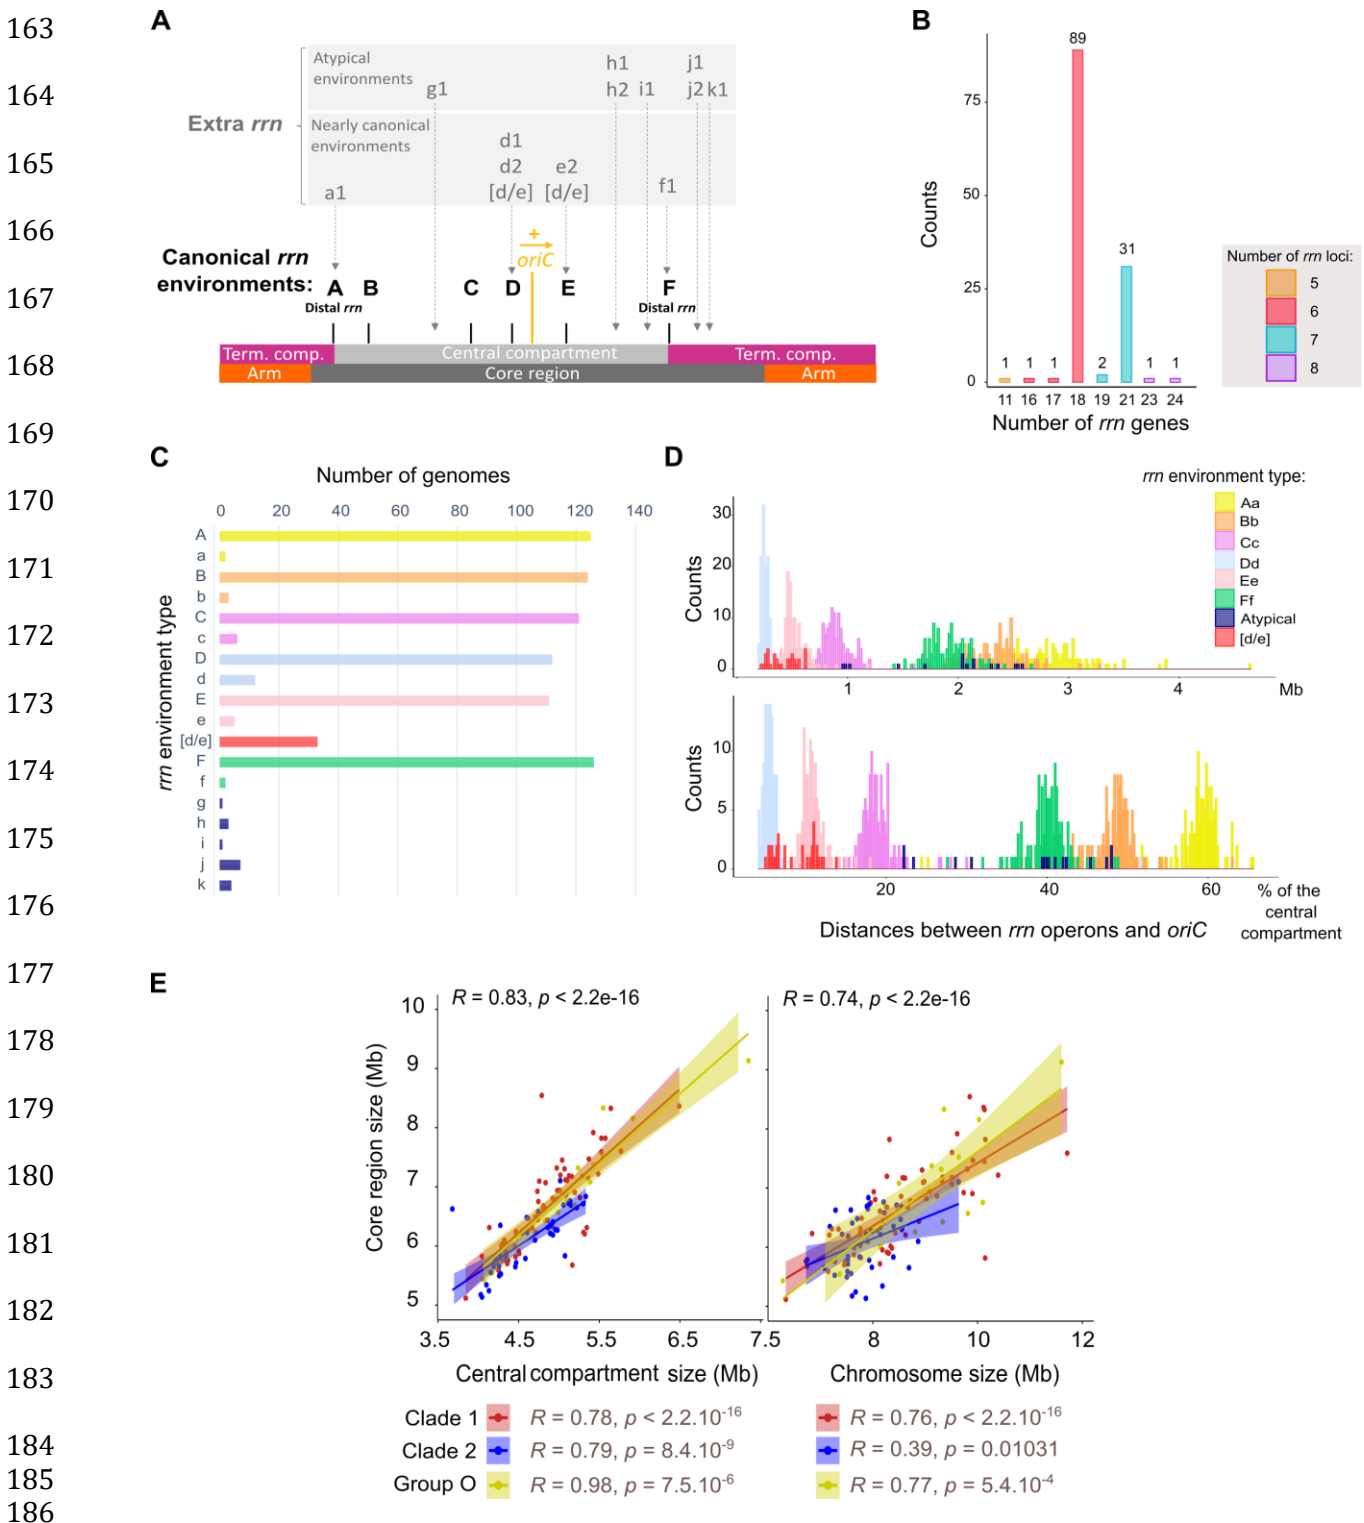

187 **Figure 1: *Streptomyces rrn* operon genetic distribution and link with the core genome**  
188 **A. Schematic representation of the location of *rrn* operons in the *Streptomyces***  
189 **genome.** The schematic representation of the chromosome is shown to scale using  
190 *S. ambofaciens* ATCC 23877 as reference. The origin of replication (*oriC*) was  
191 defined regarding the position of the *dnaA* gene, the yellow arrow representing the  
192 orientation of this gene. The detailed nomenclature describing each *rrn* environment  
193 is available in **Supplemental Figure S2**. Abbreviation: 'Term. comp.' = Terminal  
194 compartment.  
195 **B. Number of *rrn* genes in the panel of 127 genomes.** The bars are filled according to  
196 the number of *rrn* loci (corresponding to complete or incomplete operons) in each  
197 genome. The values above each box correspond to the number of genomes.  
198 **C. Frequency of the different *rrn* core gene environments in the panel of 127**  
199 **genomes.**  
200 **D. Distribution of the distances between each *rrn* operon and the origin of**  
201 **replication (*oriC*) in the panel of 127 genomes.** The distance is expressed in Mb  
202 (top) or as the percentage of the size of the 'central compartment' (bottom). The  
203 results are presented separately for each *rrn* category as defined in **Supplemental**  
204 **Figure S2**.  
205 **E. Scatter plots presenting the correlation between the core region size and the**  
206 **size of the central compartment or the chromosome.** The rho coefficients (*R*) and  
207 *p* values of Spearman's rank correlations were calculated with the whole set of  
208 genomes ( $n = 127$ ) as well as within each clade and group ( $n_{\text{Clade 1}} = 67$ ,  $n_{\text{Clade 2}} = 43$ ,  
209  $n_{\text{Group O}} = 17$ ).  
210

211 In the panel, 40.9 % of the genomes harbor the *rrn* operons in the same order along the  
212 core genome, the major shared configuration being '*rrn* ABCDEF *dnaA*+' (e.g. *S.*  
213 *ambofaciens* ATCC 23877), which was subsequently considered canonical (**Supplemental**  
214 **Table S1**). The second most frequent configuration represents 10.2% of cases and  
215 corresponds to genomes harboring a pericentric inversion [*rrn* ABCE\*D\*F *dnaA*-, e.g.  
216 *Streptomyces coelicolor* A3(2)] (**Supplemental Table S1**). Not taking into account extra  
217 copies of *rrn* or small local variations of the *rrn* environments, 50.4 % and 18.1 % of the  
218 strains have these two configurations: '*rrn* Aa Bb Cc Dd Ee Ff, *dnaA*+' ( $\pm$  extra *rrn*), and '*rrn*  
219 Aa Bb Cc (Ee)\* (Dd)\* Ff, *dnaA*-' ( $\pm$  extra *rrn*), respectively (**Supplemental Table S1; Figure**  
220 **2**). These results confirm that the proposed nomenclature allows a fairly general description  
221 of the organization of *Streptomyces* genomes, and that the ancestor of this genus probably  
222 had an '*rrn* ABCDEF *dnaA*+'-type genome.

223 Consistent with this conservation of the *rrn* genomic core environment, the distribution of  
224 the *rrn* operons along the chromosome seems rather conserved for each *rrn* category  
225 (except for the atypical *rrn* operons) and evenly spaced from the origin of replication (*oriC*)



226 **(Fig. 1D)**. This phenomenon is particularly visible if considering the distance between the *rrn*  
227 operons and *oriC* relative to the total size of the central compartment (rather than in bp) **(Fig.**  
228 **1D)**, suggesting that the central compartment appears to be an entity within which the  
229 distances of *rrn* operons to the origin co-evolve. Moreover, the distribution of *rrn* operons on  
230 either side of the origin of replication is asymmetric (2/3 on one side and 1/3 on the other) as  
231 are the distances of the A and F *rrn* operons from the origin **(Fig. 1A & D)**, leading to an  
232 imbalance in terminal compartment sizes.

233 Finally, we observed a strong correlation between the size of this core region and the  
234 size of the central compartment **(Fig.1E)**. Remarkably, these correlations are stronger than  
235 between the sizes of the core region and the whole chromosome, this latter correlation being  
236 not even statistically significant in clade 2 **(Fig. 1E)**.

237 Altogether, these observations give rise to a vision of the *Streptomyces* chromosome  
238 organized around a conserved skeleton constituted by both the core and the *rrn* genes.

239

## 240 **Evolutionary history of the *Streptomyces* genome in relation to *rrn* dynamics**

241 The core genome was used to reconstruct a phylogenetic tree which recapitulates the  
242 previously described (McDonald et Currie 2017; Lorenzi et al. 2021; Caicedo-Montoya,  
243 Manzo-Ruiz, et Ríos-Esteba 2021) division of the *Streptomyces* genus into two main  
244 monophyletic clades (clades '1' and '2') and other lineages further referred to as group 'O'  
245 (for 'others') **(Figure 2)**. By crossing this tree with genome nomenclature based on *rrn*  
246 categories and *dnaA* orientation, we propose a parsimonious scenario explaining the  
247 diversity observed in the panel of 127 analyzed genomes. According to this model,  
248 recombination between 'D' and 'E' *rrn* operons, and duplication/acquisition of *rrn* operons  
249 occurred at least 4 and 13 times, respectively **(Figure 2)**. Notably, *rrn* duplications/acquisition  
250 occurred or were fixed more frequently in clade 2 and the group 'O' than in clade 1 (odds  
251 ratio respectively of 5.5 and 14.9, *p* values respectively of  $6.7 \cdot 10^{-4}$  and  $1.2 \cdot 10^{-5}$ , Fisher's  
252 Exact Test for Count Data) **(Figure 2, Supplemental Table S1)**. The two strains harboring 8  
253 *rrn* operons both belong to clade 2. Remarkably, none of the genomes in the group 'O' show

254 any of the most frequent *rrn* configurations, highlighting the complex evolutionary history of  
255 these species (**Supplemental Table S1, Figure 2**).

256 We also identify two events of complete *rrn* operon loss by analyzing the phylogeny of  
257 *S. asterosporus* DSM 41452, *Streptomyces lydicus* A02 and *Streptomyces gilvosporeus*  
258 F607 strains (**Figure 2**). Moreover, a few strains harbor incomplete *rrn* loci, devoid of  
259 functional 5S (*S. ambofaciens* ATCC 23877) or 16S (*Streptomyces katrae* S3) *rrn* genes, or  
260 in most cases, composed of a single 5S *rrn* (*Streptomyces* sp. Sirex AA-E, *Streptomyces*  
261 *leeuwenhoekii* C34, *Streptomyces tirandamycinicus* HNM0039, *S. asterosporus*  
262 DSM 41452). To note, in the incomplete *rrn* operon of *S. ambofaciens* ATCC 23877, the  
263 sequence encoding the 5S *rrn* gene is present but has accumulated mutations  
264 (**Supplemental Figure S2.B**). Remarkably, *S. asterosporus* DSM 41452 harbors only three  
265 complete *rrn* operons, its two other *rrn* loci corresponding to single 5S *rrn* genes whose  
266 sequences differ from those present within the complete operons. Theoretically, single 5S *rrn*  
267 loci may result either from the loss of the 23S and 16S *rrn* genes or from a partial  
268 duplication/acquisition of an *rrn* operon, the distinction between these scenarios not always  
269 being possible (**Figure 2**). Altogether, these incomplete *rrn* loci or *rrn* loss remain a minority  
270 (frequency < 7 % of the 127 strains analyzed).

271

272

273

274

275

276

277

278

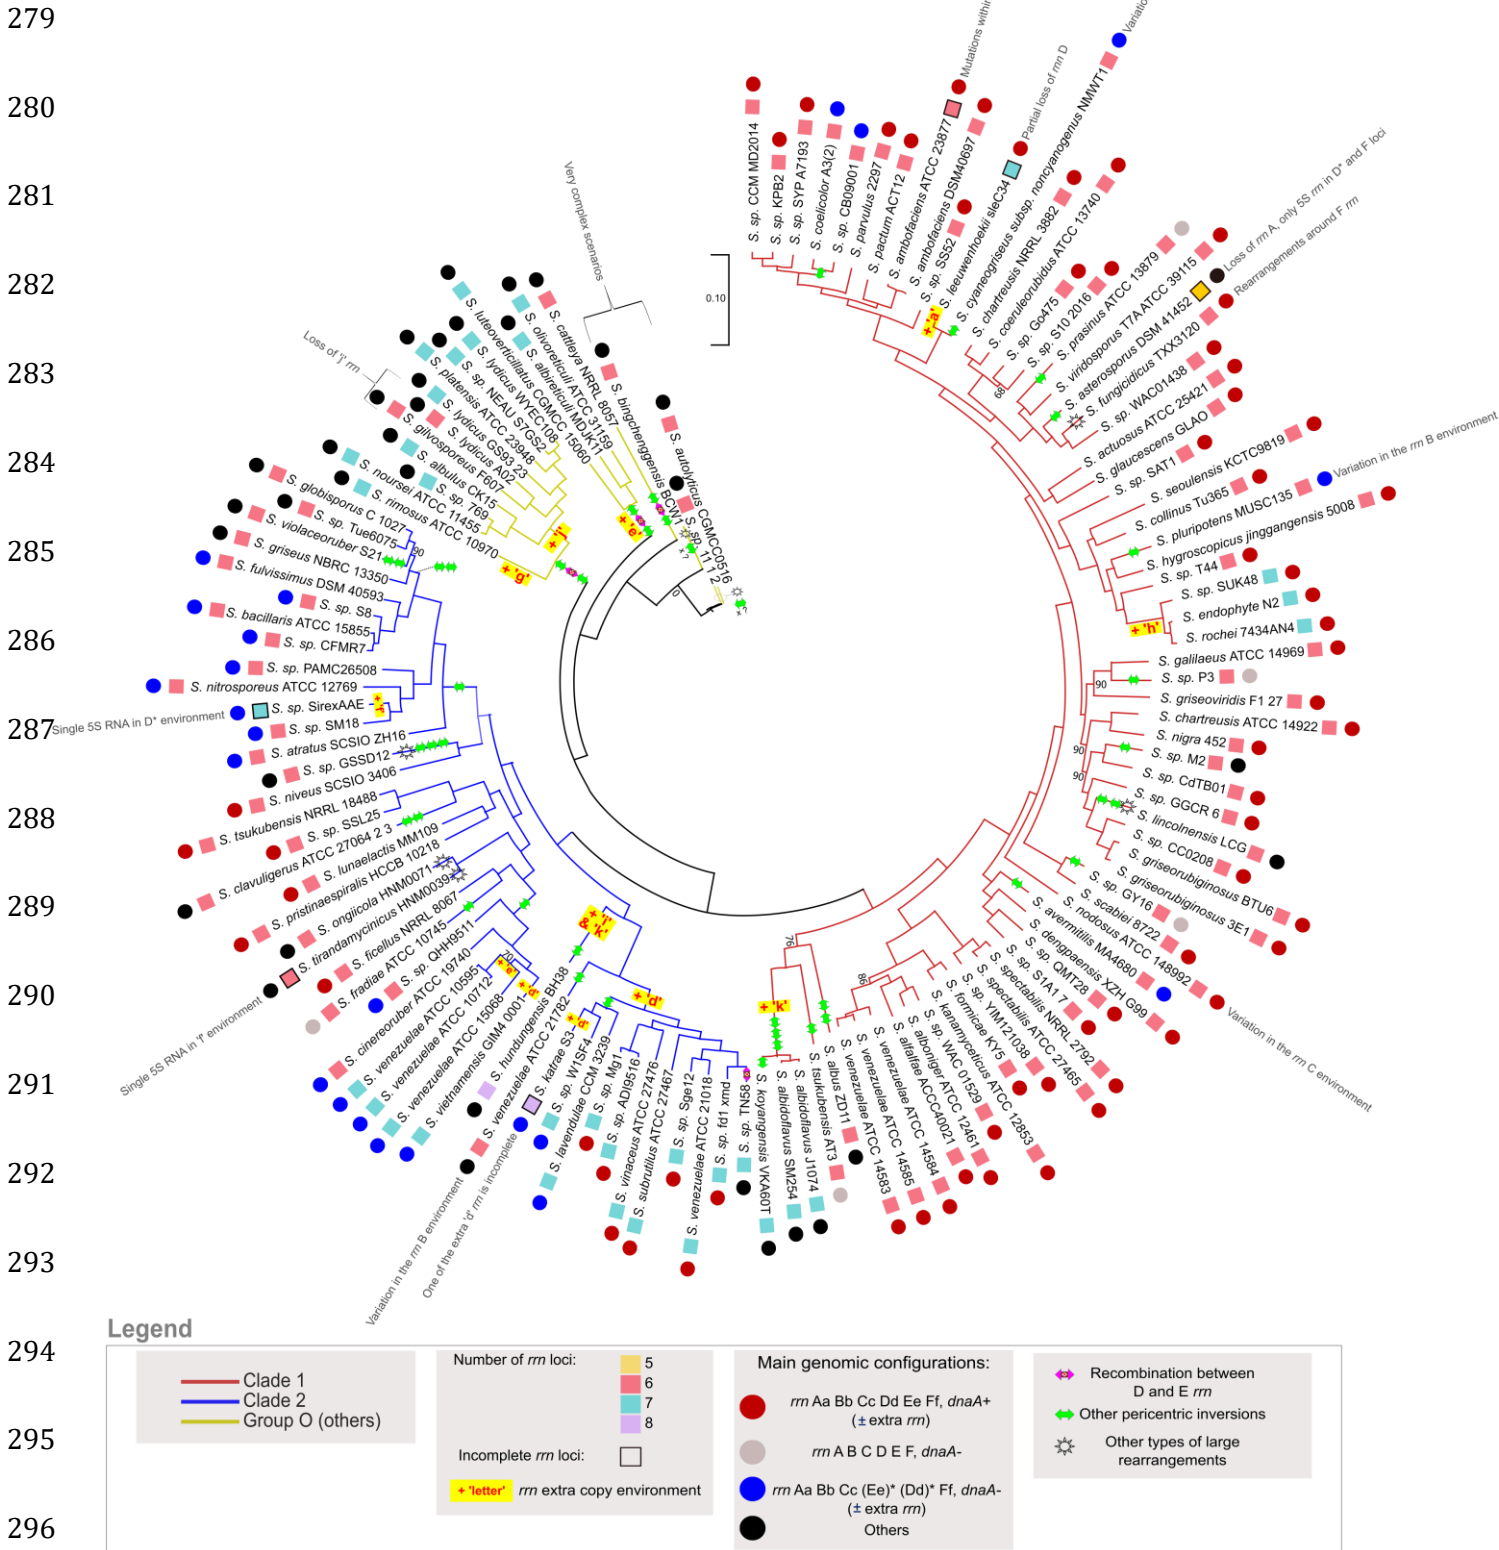

297 **Figure 2: Core genome phylogenetic tree and proposed model of *Streptomyces***  
298 **chromosome evolution regarding *rrm* operons and pericentric inversions**

299 The core genome phylogenetic tree was constructed using the 1017 core genes. The  
300 bootstrap values inferior to 95 % are indicated. Branch colors represent the two clades (1  
301 and 2) and other lineages (group 'O') of *Streptomyces* previously reported (McDonald et

302 Currie 2017; Lorenzi et al. 2021; Caicedo-Montoya, Manzo-Ruiz, et Ríos-Esteva 2021). The  
303 number and completeness of *rrn* loci as well as *rrn* configuration and main intra-  
304 chromosomal rearrangements are indicated for each strain as detailed in the legend panel.  
305 Some specific events are indicated next to the relevant strains/species. The most  
306 parsimonious scenario is proposed, but in some cases (indicated by a sun), complex  
307 rearrangements in the central compartment make it difficult to develop robust evolutionary  
308 scenarios. The **supplemental Figures S1** and **S3** present pairwise comparisons of the core  
309 genomes that support this model. Interestingly, the pairwise comparison of the core genome  
310 order of the strains *Streptomyces* sp. 11 1 2, *S. autolyticus* CGMCC0516 and *S.*  
311 *bingchenggensis* BCW 1 suggests that they probably have a common ancestor (*S.* sp. 11 1 2  
312 and *S. autolyticus* CGMCC0516 having almost the same core gene order), which the core-  
313 based phylogenetic tree fails to resolve clearly (**Supplemental Fig. S3.I**). The *rrn*  
314 configuration of each strain/species is detailed in **Supplemental Table S1**. The relative  
315 position of the events described (inversion, loss/acquisition of *rrn*, complex rearrangements)  
316 is arbitrary and does not predict the order in which the events occurred. The sign “x ?”  
317 indicates that there have been several pericentric inversions, their exact number being  
318 difficult to determine due to the highly rearranged organization of the genomes.

319 The vast majority of the *rrn* operons (99.6 %) is oriented in the direction of the  
320 continuous replication, with very few cases of lagging strand orientation (*Streptomyces*  
321 *lincolnensis* LC G, *Streptomyces bingchenggensis* BCW1) (**Supplemental Table S4**). This  
322 could either illustrate i) a strong bias introduced by *rrn* expression on chromosome  
323 organization (to avoid polymerase collisions (Sinha et al. 2017)), as previously proposed  
324 (Lim, Furuta, et Kobayashi 2012), or ii) a positive selection of the genomic organization that  
325 limits large genomic deletions in case of recombination between *rrn* operons.

326 Altogether these observations indicated that *rrn* duplication/acquisition is the most  
327 frequently fixed phenomena directly involving *rrn* operons. Taking into account evolutionary  
328 events involving *rrn* operons (gain, loss, mutation) enriches the overall picture of  
329 *Streptomyces* chromosome evolution.

330

### 331 **Large pericentric inversions located in the vicinity of *rrn* operons**

332 Driven by the observation of recombinant ‘[d/e]’ *rrn* operons (**Fig. 1D, Supplemental Fig.**  
333 **S2.A**), we examined the possible link between *rrn* operons and large genome  
334 rearrangements. We identified large rearrangements in the *Streptomyces* chromosome by  
335 comparing the order of genes from the core genome of each strain to that of *S. viridosporus*  
336 T7A ATCC 39115 (exactly ordered as the consensus). Most of them correspond to

337 pericentric inversions, with only a few other cases (e.g. *S. lincolnensis* LC G, *Streptomyces*  
338 *ongiicola* HNM0071, *S. tirandamycinicus* HNM0039, *Streptomyces fungicidicus* TXX3120,  
339 *Streptomyces* sp. 11 1 2, *Streptomyces autolyticus* CGMCC0516 and *S. bingchenggensis*  
340 BCW 1) highlighting complex evolutionary scenarios (**Fig. 2**). Indeed, the group 'O' contains  
341 the species with the largest number of rearrangement events. Given the sparse distribution  
342 of genomes in this class, this may reflect missing steps in the proposed evolutionary scenario  
343 and this 'O' group may actually contain several clades. Accordingly, three strains of this  
344 group (*Streptomyces* sp. 11 1 2, *S. autolyticus* CGMCC0516 and *S. bingchenggensis* BCW  
345 1) were considered too ambiguous to be included in the analysis presented below.

346 Core genome pairwise comparisons allowed the identification of 49 large rearrangements  
347 (> 200 kb) within the central compartment of 60 genomes, some of which likely occurred in  
348 the common ancestor of certain strains (**Fig. 2, Fig. 3, Supplemental Table S5,**  
349 **Supplemental Fig. S1 & S3**). We thereafter calculated the distances of each rearrangement  
350 end to the closest *rrn* operon (**Fig.3, Supplemental Table S5**). Although this method has a  
351 resolution limit related to the distance of core genes to *rrn* and rearrangement ends, 6 of  
352 these large rearrangements (env. 12 %) occurred less than 10 kb from an *rrn* locus, four of  
353 them corresponding to independent events of recombination between D and E *rrn* operons  
354 (**Supplemental Fig. S2**). Indeed, the distal core genes of these large rearrangements are  
355 located (at least on one side) at a median of less than 93 kb from an *rrn* operon (mainly  
356 belonging to Cc, Dd, Ee or [d/e] *rrn* categories, table of **Fig. 3.B**), a distance which  
357 represents 1.1 % of the mean genome size. Taken together, these results suggest that *rrn*  
358 operons, and especially those located around the origin of replication, constitute and/or are  
359 frequently close to recombination sites. This observation raises the question of mechanisms  
360 (other than homologous recombination between D and E *rrn* operons) by which *rrn*  
361 environments could favor the occurrence and/or fixation of pericentric inversions (see  
362 discussion).

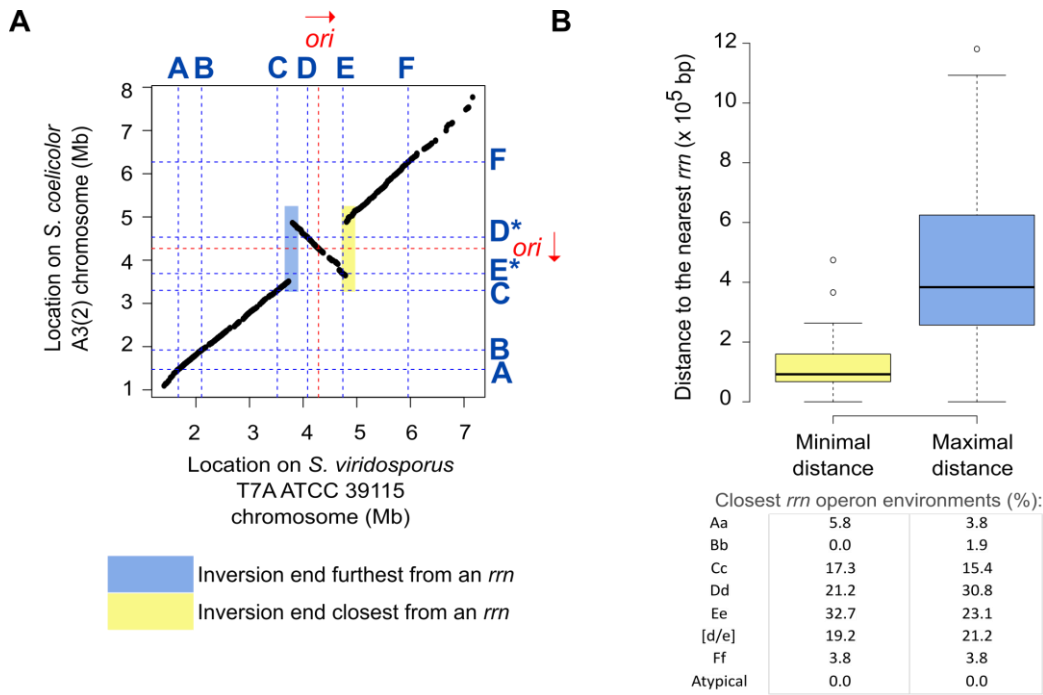

363

364

**Figure 3: Distance from *rrn* loci of large rearrangements occurring in the central**

365

**compartment**

366

**A. Pairwise comparison of the core genomes of *S. coelicolor* A3(2) and *S.***

367

***viridosporus* T7A ATCC 39115**, used as a reference for the consensus core

368

genome order in *Streptomyces*. The identity of each *rrn* locus is specified using the

369

nomenclature proposed in this study. The origin of replication (*oriC*) was defined

370

regarding the position of the *dnaA* gene, the red arrow representing the orientation of

371

this gene. The regions colored yellow and blue indicate the position of the closest and

372

farthest ends from an *rrn* operon, respectively. These were subsequently used to

373

calculate the minimum and maximum distances of the rearrangement ends to an *rrn*

374

operon, with the resolution limit of the distance of these elements to the core genes.

375

**B. Boxplot of minimal and maximal distance of the intra-chromosomal**

376

**rearrangements to *rrn* loci.** When the same event was shared by several strains,

377

the mean values (distances of both ends to the nearest *rrn* loci) were calculated so

378

that each event ( $n = 49$ ) is considered only once. The frequency of the nearest *rrn*

379

operon category is indicated for both sides. The boxplots of both panels represent the

380

first quartile, median and third quartile. The upper whisker extends from the hinge to

381

the largest value no further than  $1.5 \times$  the inter-quartile range (IQR, *i.e.* distance

382

between the first and third quartiles) from the hinge. The lower whisker extends from

383

the hinge to the smallest value at most  $1.5 \times$  IQR of the hinge.

384

385

**Link between *rrn* operons and density in core genes**

386

Driven by the observation that the sizes of the central compartment and the core

387

region are highly correlated (**Fig. 1E**), we fit general linear models to model the interplay

388

between core and *rrn* gene dynamics. We explored the predictability of the core region size

389

depending notably on the location and number of *rrn* genes. Other possible explanatory

390 variables were evaluated such as the distance to the origin of replication, the size of the  
391 chromosome and of the region encompassing all tRNA encoding genes ('tDNA region',  
392 **Supplemental Fig. S4A**), as well as the phylogenetic origin. We conducted both forward  
393 and backward regression approaches to select the best predictors. The best fitting model  
394 includes as explanatory variables: the sizes of the central compartment and of the  
395 chromosome, the maximal distance between the distal *rrn* operons and the origin of  
396 replication ('d\_max\_rrn\_ori', **Fig.4A**), as well as the number of *rrn* genes (**Supplemental Fig.**  
397 **S4**). This overall model is statistically significant ( $p < 2.2 \cdot 10^{-16}$ ) and suggests that the four  
398 explanatory variables included in the model explain approximately 86 % of the core region  
399 variability (**Supplemental Fig. S4.B**). Accordingly the correlation between the observed size  
400 of the core region and the value predicted by this ANOVA model is very strong ( $R = 0.92$ ,  $p <$   
401  $2.2 \cdot 10^{-16}$ , Pearson correlation, **Fig.4A**), supporting the existence of an evolutionary  
402 relationship between the position of distal *rrn* genes and the core region.

403         The size of the tDNA region was not among the best predictors of the size of the core  
404 region (**Supplemental Fig. S4A**), emphasizing the importance of *rrn*-defined limits *per se*,  
405 independently of their role in the translation process. Moreover, this analysis supports the  
406 fact that the evolution of the core region size is determined by the number of *rrn* genes rather  
407 than their phylogenetic origin.

408         Remarkably, the increase in the number of *rrn* operons is correlated with a decrease  
409 in the core region size. This result highlights some kind of core region 'densification' (*i.e.*  
410 fewer non-core genes in the core region) correlated to the increase in the number of *rrn*  
411 operons (**Fig.4B & C**). This effect is in fact limited to the central compartment which harbors  
412 slightly more core genes per kb in genomes containing at least 19 *rrn* genes than in those  
413 containing up to 18 *rrn* genes (**Fig.4D**). The central compartment *per se* is 2.7-fold more  
414 dense in core genes (per size unit) than the core region located between the distal *rrn* and  
415 the last core genes ('delta\_core\_rrn' in the **Supplemental Fig.S4A**), as illustrated for *S.*  
416 *coelicolor* in **Figure 5A**. Overall, these results indicate that *rrn* operons define a central

417 compartment characterized by a high density of core genes, a feature that tends to be more  
 418 pronounced as the number of *rrn* genes increases.

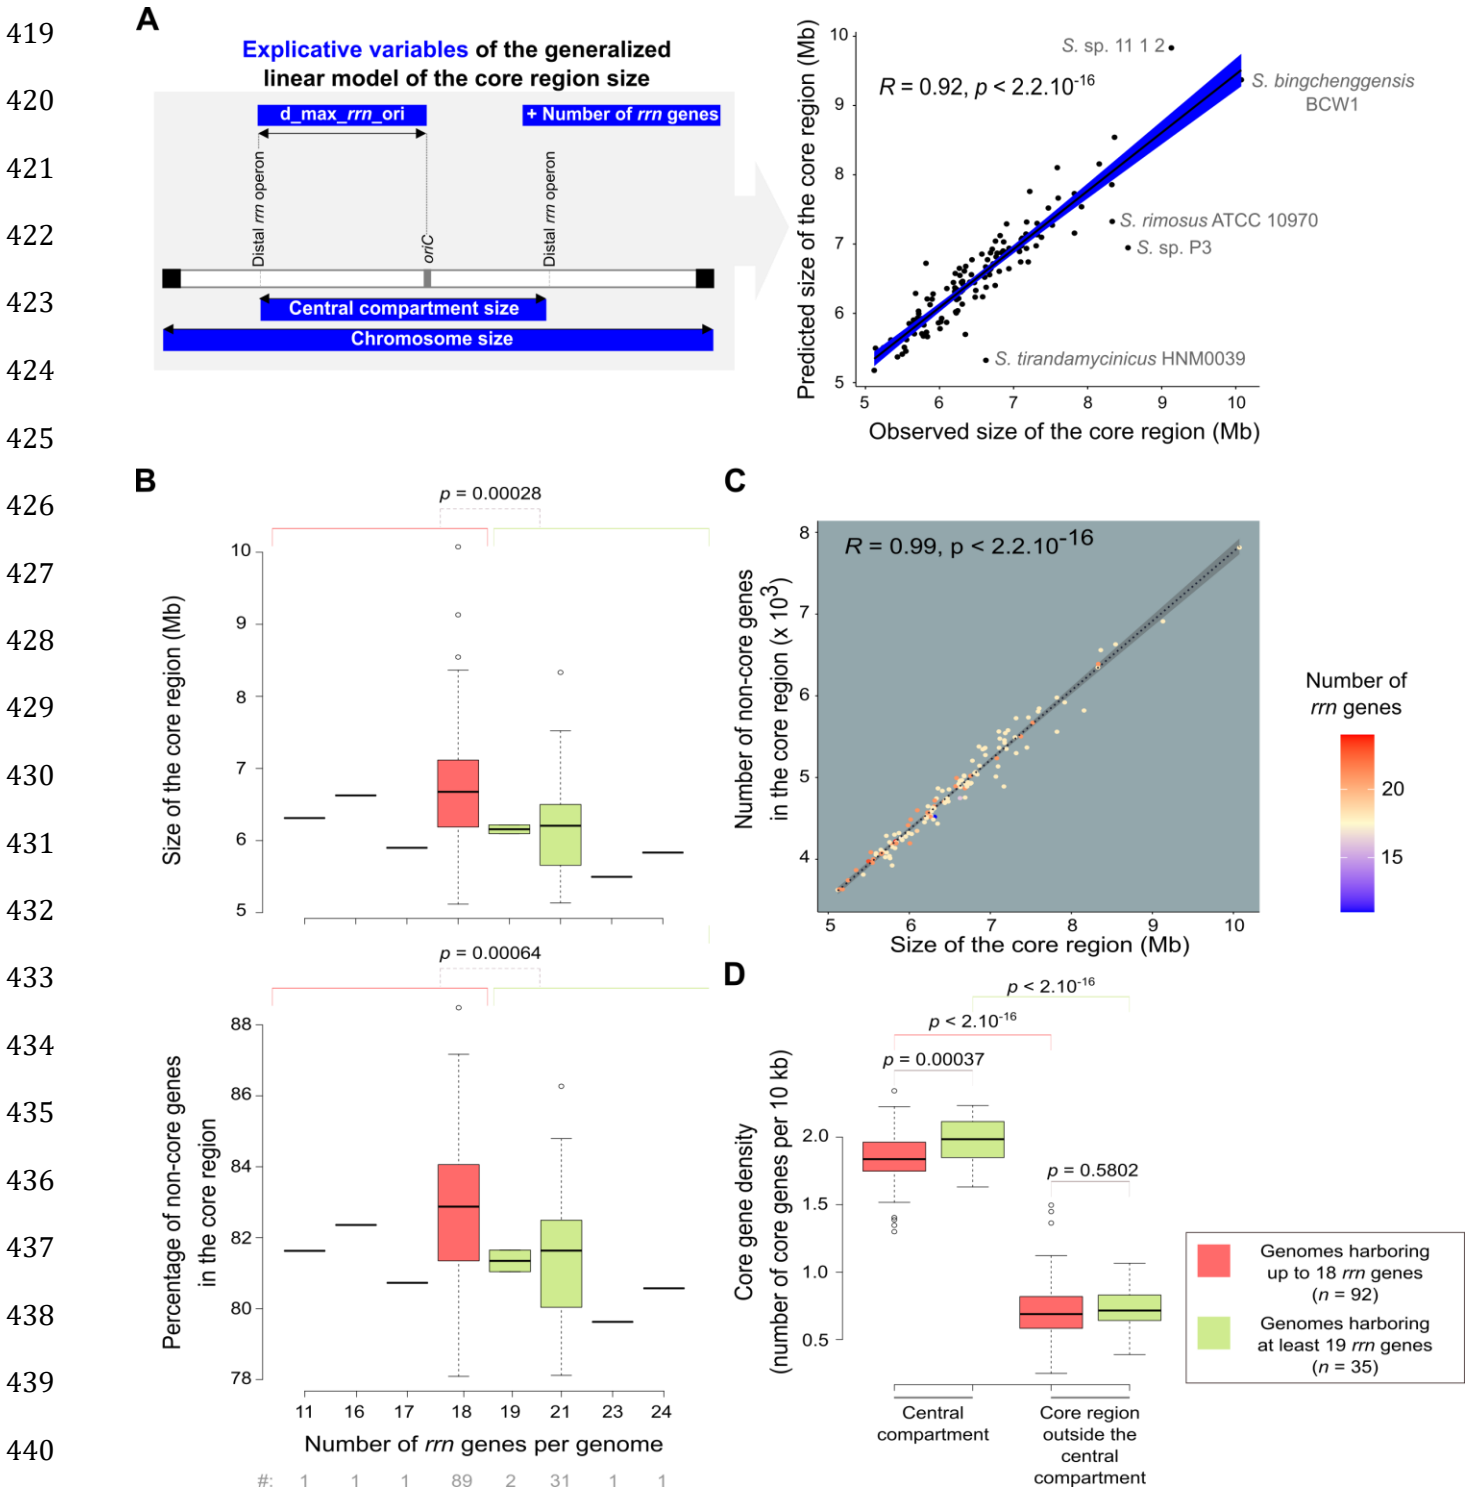



445

## Figure 4: Interplay between *rrn* operons and core region dynamics

446

- A. Correlation between the predicted and observed core region sizes in the panel of 127 genomes of interest.** The explanatory variables are represented in the left panel. The  $R$  coefficient and  $p$  value of Pearson's correlation tests were calculated with the whole set of genomes ( $n = 127$ ). The names of the species are indicated for the genomes that present an unusual pattern in the diagnostic tests (**Supplemental Fig.S4**). In fact, these genomes belong to the 'O' group, except for *Streptomyces* sp. P3 genome which has the most asymmetric organization (**Supplemental Table S1**). This suggests that the prediction model has limitations in the case of rather complex evolutionary scenarios or atypical genomic organizations and/or could help to identify them.
- B. Boxplots presenting the size of the core region and its percentage of non-core genes depending on the number of *rrn* genes.** The boxplots represent the first quartile, median and third quartile. The upper whisker extends from the hinge to the largest value no further than  $1.5 * \text{the inter-quartile range (IQR, i.e. distance between the first and third quartiles)}$  from the hinge. The lower whisker extends from the hinge to the smallest value at most  $1.5 * \text{IQR}$  of the hinge. Outliers are represented (dots). The  $p$  values of two-sided Wilcoxon rank sum tests with continuity correction comparing the values observed in genomes harboring up to 18 *rrn* genes (red) in genomes harboring at least 19 *rrn* genes (green) are indicated. The number of genomes in each category ('#') is indicated below the graphs.
- C. Scatter plot presenting the correlation between the core region size and the number of non-core genes.** The rho coefficients and  $p$  values of Spearman's rank test were calculated with the whole set of genomes ( $n = 127$ ). Each point corresponds to a genome colored according to the number of *rrn* operons it contains.
- D. Boxplot presenting the core gene density depending on the number of *rrn* genes and the location inside or outside the central compartment.** The boxplot represents the same parameters as in panel B. The core gene density expressed as the number of core genes per 10 kb was calculated in the central compartment and in the core region located outside the central compartment ('delta\_core\_rrn' in the **Supplemental Fig.S4A**). The  $p$  values of two-sided Wilcoxon rank sum tests with continuity correction are presented.

447

448

449

450

451

452

453

454

455

456

457

458

459

460

461

462

463

464

465

466

467

468

469

470

471

472

473

474

475

### The gene content within the central compartment is remarkably stable

476

We then explored the qualitative gene content in the central compartment. We

477

previously reported the interest of using the gene persistence index to evaluate the level of

478

gene conservation along the *S. ambofaciens* ATCC 23877 chromosome (Virginia S. Liroy et

479

al. 2021). This index corresponds to the frequency of a given gene in a set of complete

480

genomes of interest. In the present study, we enlarged this analysis to all the genomes of our

481

panel (**Supplementary Fig. S5**). As illustrated by the representative example of the *S.*

482

*coelicolor* A3(2) chromosome (**Fig. 5A**), beyond the distal *rrn* operons, there are generally a

483

few core genes and then gene persistence decreases sharply. More precisely, the gene

484

persistence index fluctuates along the genome, reaching the highest levels within the central

485

compartment, especially near the origin of replication. The *rrn* operons, especially the ones

486

located in a canonical core gene environment, usually localize with a persistence peak

487

superior to 0.8, except for the 'D' *rrn* category (**Supplemental Fig. 6**). Another notable

488 exception involves the *rrn* operons in the lagging orientation in *S. bingchenggensis* BCW1  
489 **(Supplemental Fig. S5).**

490 Importantly, gene persistence around the distal *rrn* operons is in general higher than at  
491 the limits of the core region (**Fig. 5B**). This result is in accordance with the lower core gene  
492 density observed in the core region outside the central compartment (**Fig.4D**).

493 We previously reported (Virginia S. Lioy et al. 2021) that whereas the size of the central  
494 compartment represents a little more than half of the entire chromosome (updated values:  
495  $57.7 \pm 5.7$  %, standard deviation,  $n = 127$ ), the percentage of core genes within the central  
496 compartment is remarkably high and stable (updated values:  $88.5 \pm 3.0$  %, standard  
497 deviation,  $n = 127$ ). In this study, we have extended this observation by analyzing the  
498 qualitative composition of the central compartment in core genes. Interestingly, a set of 901  
499 core genes is almost always located in the central compartment of the *Streptomyces*  
500 genomes we analyzed (**Fig. 5C**). This set of genes, further named CCC genes for ‘central  
501 compartment core’ genes, are enriched in genes encoding key cellular processes (‘private  
502 goods’) related, for instance, to central metabolism and translation (**Supplemental Figure**  
503 **S7.A**). The genes of the core genome that are generally located in the terminal domains,  
504 further termed TCC genes for ‘terminal compartment core’ genes, are enriched in only a few  
505 functional categories, related mostly to lipid metabolism (**Supplemental Figure S7.B**).

506 Altogether, these results indicate that the central compartment constitutes a specific  
507 evolutionary entity and suggest that the distal *rrn* operons constitute pertinent limits to  
508 describe a functional central compartment in the *Streptomyces* genome.

509

510

511

512

513

514

515

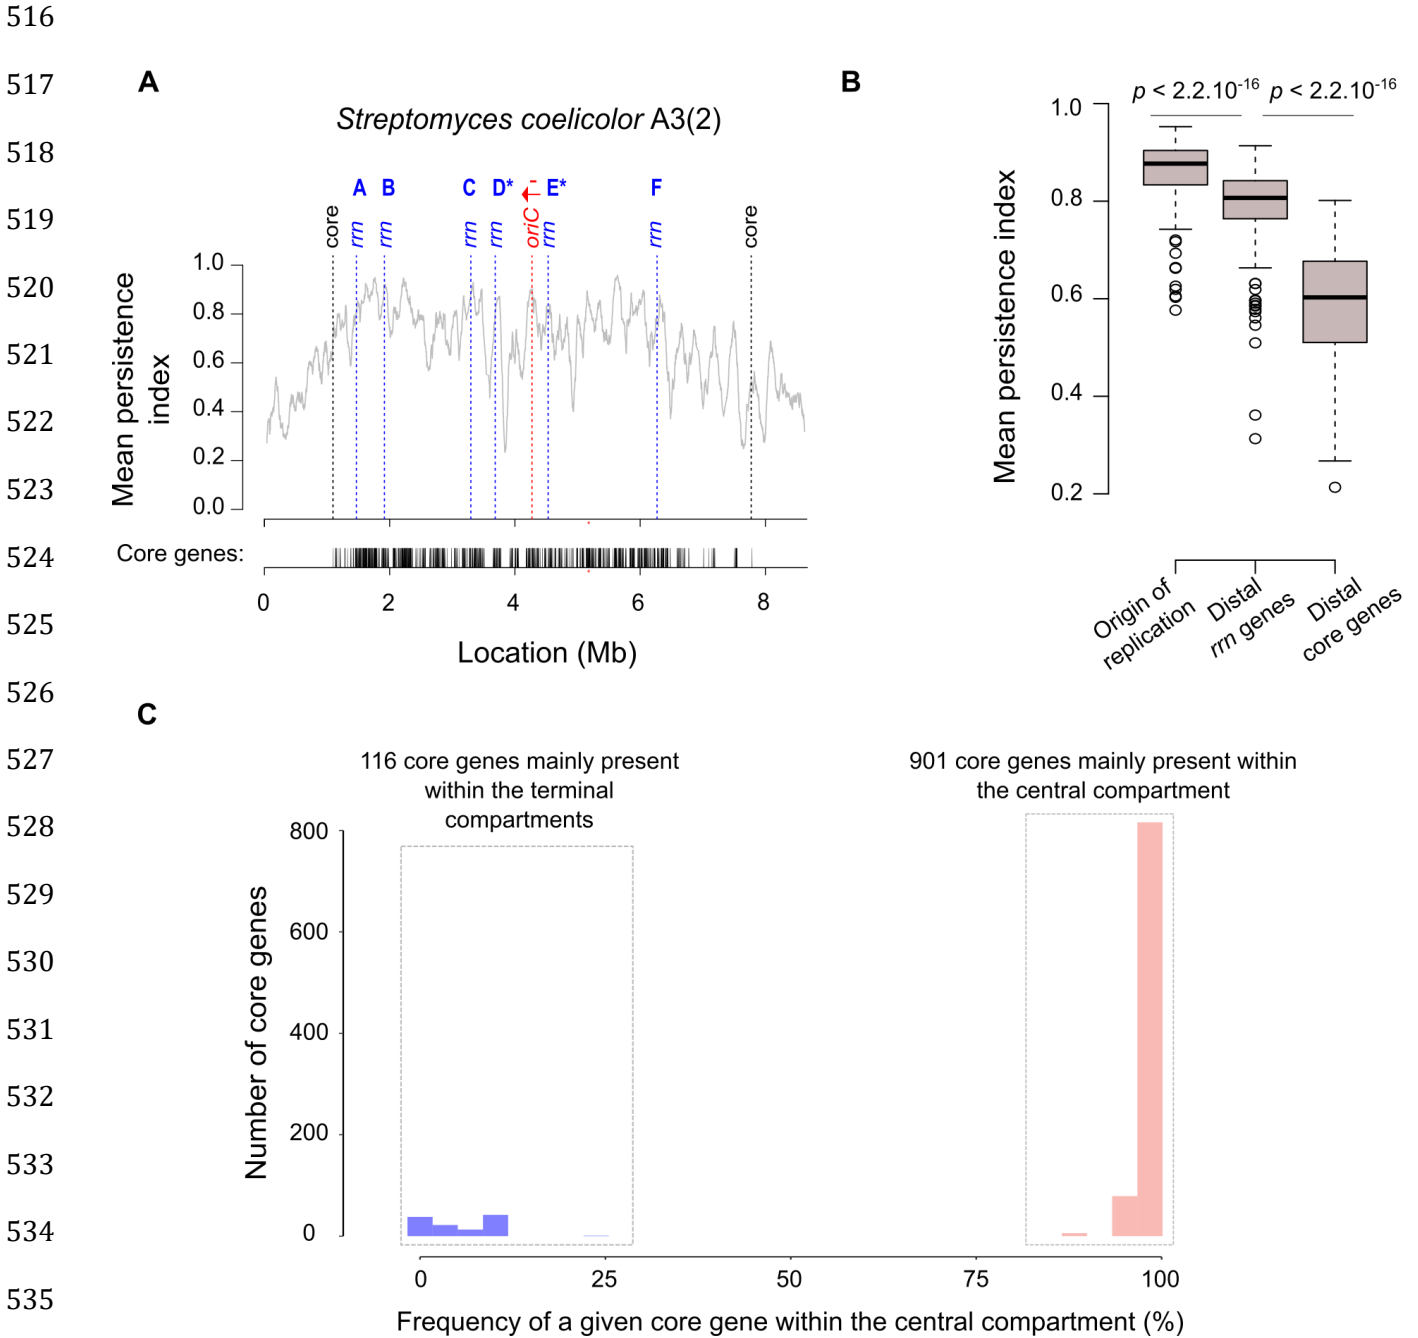

**Figure 5: Gene persistence and core gene content within the central compartment**

- 537
- 538
- 539
- 540
- 541
- 542
- 543
- 544
- 545
- 546
- 547
- 548
- A. Gene persistence along the chromosome of *S. coelicolor* A3(2).** The level of persistence along the chromosome is represented using a sliding window (81 coding sequences (CDSs), with 1 CDS steps). The positions of distal core genes ('core') and of all *rrn* operons are indicated by dashed lines. The density of the core genes is indicated below the graph. The identity of each *rrn* operon is specified using the nomenclature as proposed in this study (**Supplemental Figure S2**). The origin of replication (*oriC*) was defined regarding the position of the *dnaA* gene, the red arrow representing the orientation of this gene.
- B. Mean gene persistence in the regions surrounding the origin of replication, the distal *rrn* and core genes.** The mean persistence was calculated within a window of 81 CDS centered on the genomic feature of interest. The boxplot is built as in **Fig.4B**. The *p* values of a two-sided Wilcoxon rank sum test with continuity correction

549 comparing the mean persistence index at the vicinity of the origin of replication ( $n =$   
550 127), and of the distal *rrn* ( $n = 254$ ) or core ( $n = 254$ ) genes, are indicated.

551 **C. Distribution of the core genes within and outside the central compartment.**  
552

### 553 High levels of transcription in the central compartment of *Streptomyces* genomes

554 To examine the central compartment from a functional point of view, we compared  
555 gene expression inside and outside this region over growth. We thus analyzed the available  
556 transcriptome data during metabolic differentiation of seven *Streptomyces* species from the  
557 clade 1 [*S. ambofaciens* ATCC 23877 (Virginia S. Liroy et al. 2021), *S. avermitilis* MA 4680  
558 (Kim et al. 2020), *S. coelicolor* A3(2) (Jeong et al. 2016)], clade 2 [*S. clavuligerus* ATCC  
559 27064 2 3 (Kim et al. 2020), *S. tsukubensis* NRRL 18488 (Kim et al. 2020), *S. venezuelae*  
560 ATCC 10712 (Gehrke et al. 2019)], and group 'O' [*S. bingchenggensis* BCW 1/BC-101-4 (P.  
561 Jin et al. 2020)].

562 For all species, we observed a positive correlation between gene persistence and  
563 expression (**Fig.6A, Supplemental Fig. S8**), as previously reported in *S. ambofaciens* ATCC  
564 23877 (Virginia S. Liroy et al. 2021) and other bacteria (Acevedo-Rocha et al. 2013). As  
565 expected, this positive correlation is the highest during the trophophase, *i.e.* during  
566 vegetative growth which is associated with the lowest expression of variable regions  
567 belonging to the specialized metabolite biosynthetic gene clusters (SMBGCs) (Virginia S.  
568 Liroy et al. 2021) (**Supplemental Fig. S9**). We then compared the strength of this correlation  
569 as a function of whether the genes were located inside or outside the central compartment.  
570 Interestingly, for all strains, the positive correlation between gene persistence and  
571 transcription, measured by the Rho Spearman coefficient, is higher ( $\approx + 30\%$ ) in the central  
572 compartment than in the terminal compartments (**Fig. 6A**). Moreover, during the  
573 trophophase, genes are more expressed in the central compartment, regardless of their  
574 category (core, non-core or SMBGC genes), in most strains (**Supplemental Fig. S9**).  
575 Remarkably, this higher expression in the central compartment is conserved in all strains for  
576 non-core genes and SMBGCs during the idiophase (*i.e.* after the metabolic differentiation  
577 leading to specialized metabolite/idiolyte production) (**Supplemental Fig. S9**). Altogether

578 these results indicate that the central compartment delimitates a region associated with  
579 increased transcription (and/or RNA stability) compared to the rest of the genome.

580 We therefore consider the possibility that this effect could be related to a dose effect,  
581 gene copy number being higher close to the origin of replication in actively replicated  
582 chromosomes. We thus calculated the correlation between the level of expression and the  
583 distance to the origin, according to the localization of the genes inside or outside the central  
584 compartment (**Fig. 6B**). Remarkably, this dose effect is negligible in the central compartment,  
585 whereas the distance from the origin of replication is associated with a decrease in the  
586 quantity of transcripts produced from the terminal compartments, especially from non-core  
587 genes (**Fig. 6B**).

588 These results indicate that the central compartment is associated with a higher level  
589 of gene expression, regardless of either gene persistence or distance to the origin of  
590 replication in the seven strains we analyzed, even in *S. bingchenggensis* BCW 1/BC-101-4  
591 which presents an atypical central compartment core gene content as a result of extensive  
592 chromosomal rearrangement ('*rrn a2 F\* c2 d3 E b1\* dnaA+*' configuration, **Supplemental**  
593 **Fig.S1**). Indeed, 85 core genes usually located in the terminal compartments are present  
594 within the central compartment of *S. bingchenggensis* BCW 1, 46 core genes being relocated  
595 from the central to the terminal compartments in this strain. The pattern of correlations  
596 between gene expression and distance to the origin is globally the same in *S.*  
597 *bingchenggensis* BCW 1 as in the other strains examined (**Fig.6B**). These data thus strongly  
598 suggest that the physical location of genes in the central compartment *per se* is a major  
599 determinant of their higher expression.

600

601

602

603

604

605

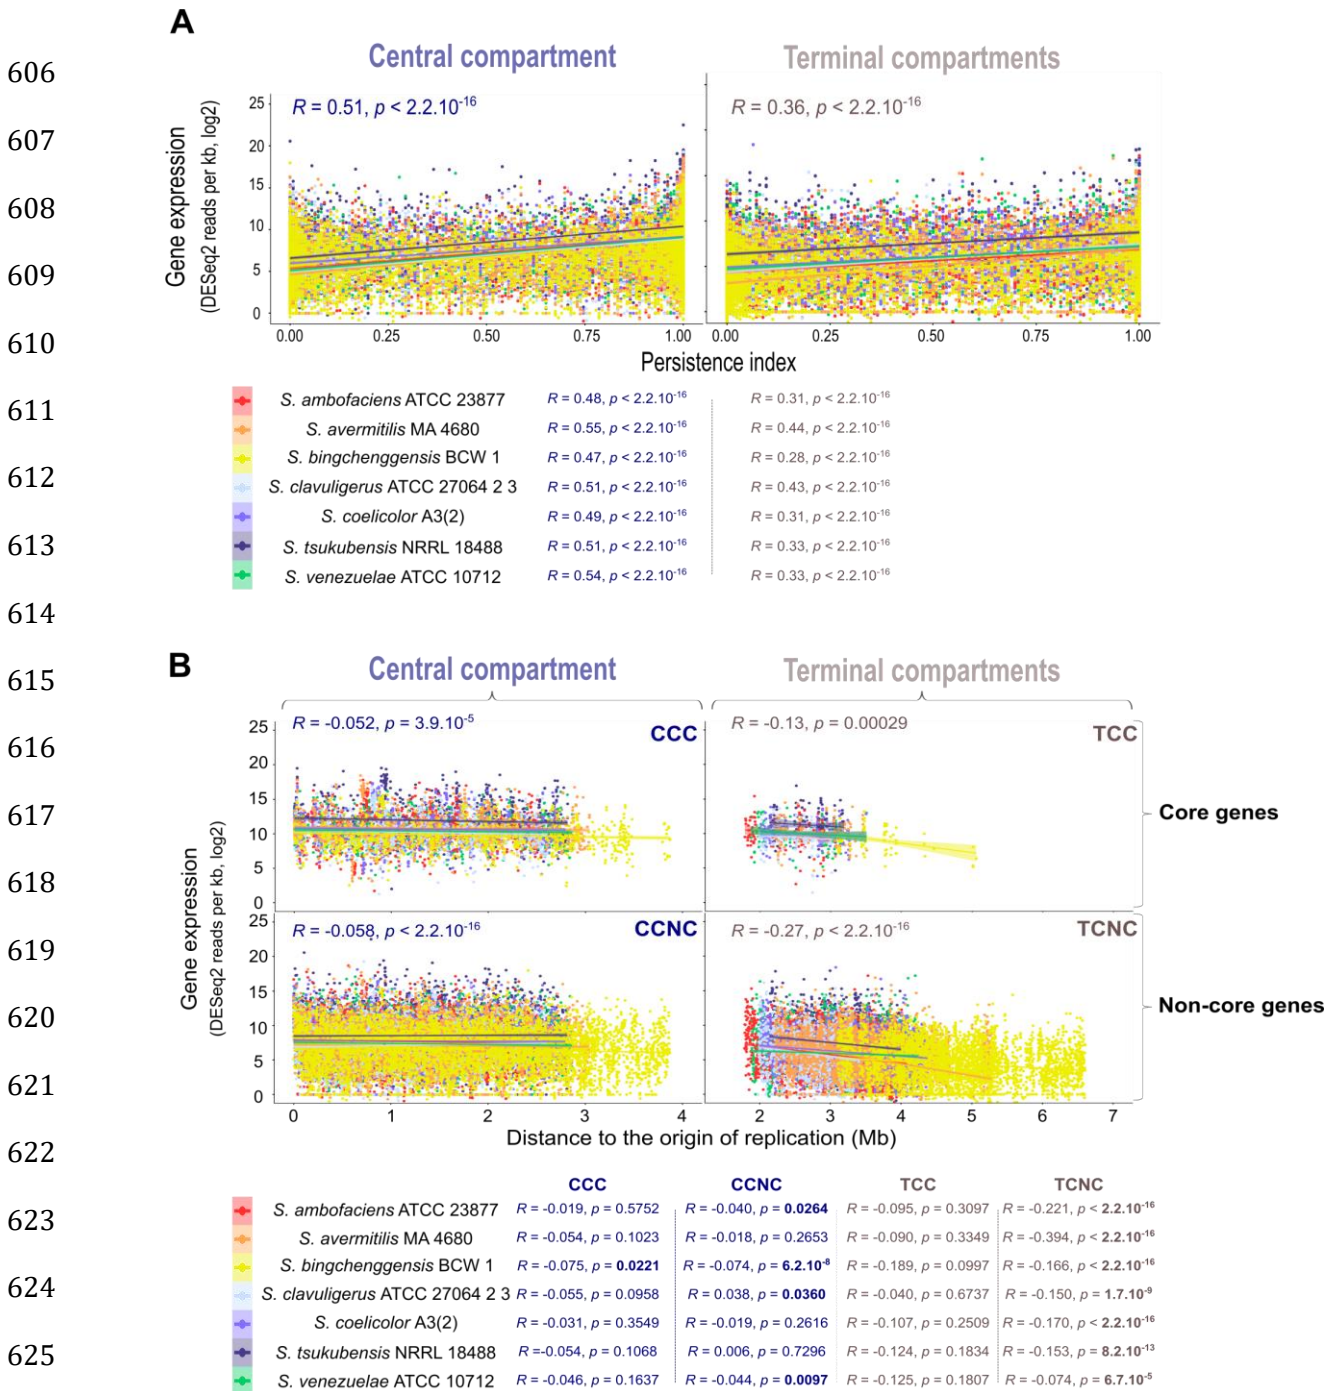

**Figure 6: Gene expression level depending on the location inside or outside the central compartment**

- A. Correlation between gene expression and gene persistence in the central (left) and terminal (right) compartments.** Gene transcription (in sense orientation) during the trophophase corresponds to the log 2 of the number of DESeq2 normalized reads per kb. The correlations were analyzed by a Spearman's rank correlation test, performed on the whole transcriptomes (values indicated on the graph) or for each species individually (values indicated below the graph).
- B. Correlation between gene expression and the distance to the origin of replication in the central (left) and terminal (right) compartments.** Core (top) and non-core (bottom) gene transcription (in sense orientation) were measured during the trophophase and expressed as the log 2 of the number of DESeq2 normalized reads per kb. The correlations were analyzed by a Spearman's rank correlation test,

639 performed on the whole transcriptomes (values indicated on the graph) or for each  
640 species individually (values indicated below the graph). Statistically significant *p*-values  
641 are written in bold. Abbreviations: CCC (central compartment core genes); CCNC  
642 (central compartment non-core genes); TCC (terminal compartment core genes);  
643 TCNC (terminal compartment non-core genes).  
644

## 645 Discussion

646 This study reports for the first time the in-depth analysis of *rrn* operon dynamics in a  
647 panel of 127 *Streptomyces* species. We gather a series of observations supporting that *rrn*  
648 operons are part of a core skeleton and can be distinguished based on their core gene  
649 environment. This allows us to propose a new genome nomenclature based on *rrn* operons  
650 and *dnaA* orientation. On this basis, we defined a canonical organization ('*rrn* ABCDEF  
651 *dnaA*+') carried by 42% of species, and a consensus order of genes from the core genome,  
652 perfectly conserved in some contemporary strains such as *S. viridosporus* T7A ATCC 39115.  
653 The pairwise comparison of the genes of the core genome and *rrn* organization of this  
654 species to other strains/species of our panel (**Supplemental Fig. S2 & S3**) allow us to  
655 propose an evolutionary history of the central compartment of the *Streptomyces*  
656 chromosome (**Fig. 2**).

657 Interestingly, *rrn* operons, especially centrally located (*rrn* C, D and E, **Fig. 7**), tend to be  
658 close to rearrangement borders (**Fig. 3**), some being directly involved in homologous  
659 recombination (**Fig.2**). This suggests that recombination events in the vicinity of the  
660 pericentric *rrn* operons are more fixed and/or more frequent. We recently published *S.*  
661 *ambofaciens*' chromosome conformation during metabolic differentiation, and we showed  
662 that, in exponential phase, these *rrn* operons form sharp boundaries (Virginia S. Liroy et al.  
663 2021), reflecting their high transcription. Moreover, they are localized in a central region that  
664 appears to be enriched in contacts around the origin (Virginia S. Liroy et al. 2021) (**Fig.7**).  
665 Inter-arm contacts are favored by the SMC machineries in the *S. venezuelae* ATCC 10712  
666 chromosome (Szafran et al. 2021). Thus we speculate that the intra-chromosomal  
667 recombination observed in these regions could perhaps result from the spatial proximity of  
668 these regions and/or the occurrence of DNA breaks related to the strong structural tensions

669 exerted in this genomic region (boundaries related to strong transcription, loop exclusion by  
670 SMC near the origin, and/or DNA replication progression in actively replicating cells).  
671 Interestingly, Fleurier *et al.* (Fleurier *et al.* 2022) recently demonstrated that transcription-  
672 dependent DNA replication blockages at overexpressed *rrn* operons can result in DNA  
673 breakage and cell death. Consequently, double strand breaks may be more frequent at the  
674 vicinity of *rrn* operons and stimulate pericentric inversions. This raises the question of  
675 whether this process is widespread in bacteria since recombination between *rrn* operons  
676 (Jumas-Bilak *et al.* 1998; Klockgether *et al.* 2010; Sato *et al.* Miyazaki 2017; Irvine *et al.* 2019;  
677 Gifford, Dasgupta, *et al.* Barrick 2021) or domain boundaries at the *rrn* operons (V. S. Liroy *et al.*  
678 2018; Le *et al.* Laub 2016; Böhm *et al.* 2020; Marbouty *et al.* 2015; Wang *et al.* 2015) have also  
679 been reported in other bacteria.

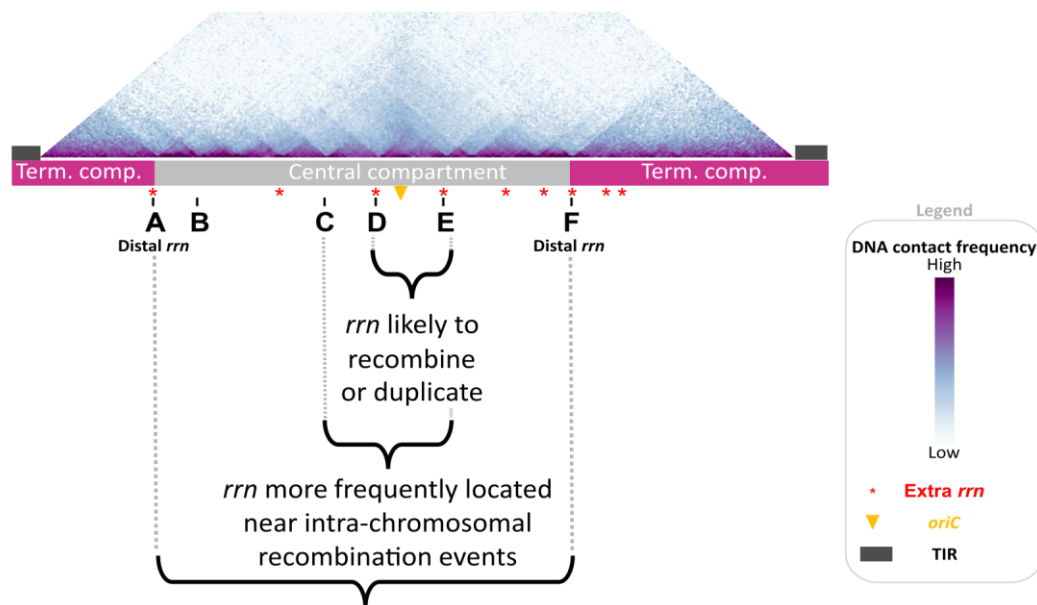

- ✓ Very dense nearly invariant core gene content (env. 88 % of the core genes)
- ✓ Highest expression levels, regardless of gene persistence and distance to *oriC*

681 **Figure 7: Main properties of the *Streptomyces* chromosome in relation to *rrn* operons**

682 The schematic representation of the chromosome is shown to scale using *S. ambofaciens* ATCC 23877  
683 as reference. The DNA contacts along its chromosome in exponential phase have been previously  
684 reported (Virginia S. Liroy *et al.* 2021). The relative positions of extra *rrn* copies in other *Streptomyces*  
685 genomes are indicated in red. Abbreviations: 'term. comp.' = terminal compartment; TIR = terminal  
686 inverted repeats.



687 Overall, our study provides a model of the core genome size based on predictors that  
688 can be easily collected from the knowledge of the genome sequence (chromosome size,  
689 position and number of *rrn* genes, position of the origin of replication - **Fig.4A, Supplemental**  
690 **Fig. S4**). Moreover, the location of the distal *rrn* operons can be easily implemented in  
691 dedicated software as an additional criterion for predicting regions of interest in the search  
692 for antibiotic-encoding SMBGCs, which tend to be acquired by horizontal gene transfer and  
693 enriched in the terminal and variable regions.

694 Our results confirm that *rrn* operons co-evolve closely with the core genome, their  
695 number being an important determinant to explain its dynamics (**Fig. 4**). The ancestor of the  
696 *Streptomyces* genus probably had 6 *rrn* operons, the acquisition of additional *rrn* being fixed  
697 at least 13 times independently during genus evolution (**Fig. 2**). Interestingly, the acquisition  
698 of an extra copy of *rrn* leads to a decreased propensity of the core region to contain non-core  
699 genes (**Fig. 4**). This could reflect less acquisition of foreign DNA and/or the displacement of  
700 poorly conserved genes towards the ends. Overall, these results are consistent with the  
701 observation that the central region of the *Streptomyces* chromosome is more constrained  
702 than the arms, gene flux and shuffling operating more intensively in the latter (Lorenzi et al.  
703 2021).

704 In parallel, we show that the *rrn* are close to highly persistent gene environments and  
705 constitute approximate limits beyond which the persistence of genes tends to decrease  
706 rapidly (**Fig.5, Supplemental Fig. S5**). In fact, while the concept of genomic  
707 compartmentalization of the *Streptomyces* chromosome is not new, defining the exact  
708 barriers has remained a challenge. Here, we propose to consider distal *rrn* as structural limits  
709 since they delimitate a highly conserved and expressed region, harboring 88.5 % of the core  
710 genome, almost always composed of the same set of core genes.

711 This central compartment has functional consequences. Indeed, the correlation between  
712 gene persistence and expression is stronger within than outside this region. Higher  
713 transcription propensity at the vicinity of *rrn* operons has also been reported in *Escherichia*  
714 *coli* (Scholz et al. 2019). Moreover, the expression of the genes located within the

715 compartment is independent of a dose effect, *i.e.* it is not correlated with the distance to the  
716 origin of replication. These observations suggest that the central compartment may constitute  
717 a specific molecular environment.

718 HiC experiments performed in eukaryotes and some archaea revealed the existence of  
719 two compartments, namely A/B type associated to high and low transcription, respectively  
720 (Takemata et Bell 2021; Lieberman-Aiden et al. 2009). Remarkably, a hub-like structure with  
721 colocalized genes involved in ribosome biogenesis has been identified in the genome of  
722 some archaea (Takemata et Bell 2021). At present, bacteria with circular genomes are  
723 considered to lack such compartments. The present study supports the existence of a  
724 bacterial nucleolus-like environment, constituting a molecular environment/compartment  
725 prone to transcription.

726 Collectively, these results indicate a link between evolutionary processes, including  
727 genome compartmentalization and *rrn* operon dynamics in *Streptomyces*. Our study raises  
728 the question of whether *rrn* operons are directly involved in genome compartmentalization,  
729 for example by protecting the core from terminal recombination, or whether they are just  
730 proxies for the evolution of a core skeleton. We believe this study brings new insights into the  
731 rules governing chromosome spatial organization, expression, recombination and evolution.

732

## 733 **Methods**

### 734 **Genome annotation and orthology assignment**

735 The set of genomes used in this study consists of 125 genomes whose selection was  
736 previously described (Lorenzi et al. 2021), to which we added 2 genomes of model strains  
737 (*S. venezuelae* ATCC 10712 and *S. albidoflavus* J1074) for which genomic data are  
738 available. All genomes (**Supplemental Table S1**) were automatically annotated on the RAST  
739 server (Aziz et al. 2008; Overbeek et al. 2014) using the RAST Classic pipeline (FIGfam  
740 version: release 70) to standardize annotation protocols, a key step for the subsequent  
741 assignment of orthology relationships. For each pair of genomes, orthologs were identified by  
742 BLASTp reciprocal best hits (BBH) (Fang et al. 2010; Tatusov, Koonin, et Lipman 1997;

743 Overbeek et al. 1999) with at least 40% identity, 70% coverage (based on the shortest  
744 sequence) and an E-value of less than  $10^{-10}$ . Each orthologous group was identified by a  
745 number using a graph approach based on a simple linkage method (**Supplemental Figure**  
746 **S10**). The core-genome corresponds to the set of orthologs (1017) present in all the  
747 genomes of our dataset and forming a clique (**Supplemental Figure S10**). The annotation of  
748 the whole genomes is available in **Supplemental Table S6**. The SMBGCs and prophages  
749 were predicted using AntiSMASH5.0 (Blin et al. 2019) and PHASTER (Arndt et al. 2016),  
750 respectively.

751

### 752 **Phylogenetic analysis**

753 For each strain, the protein sequences of the 1017 genes of the core-genome were retrieved.  
754 The sequences were concatenated and aligned with MAFFT (Katoh 2002; Katoh et Standley  
755 2013) (v7.490). The multiple alignment (441,390 positions) was then subjected to RAxML-  
756 NG (Kozlov et al. 2019) with the LG substitution model for maximum-likelihood-based tree  
757 inference. Fifty bootstrap replications were performed. The phylogenetic tree was  
758 represented using MEGA X software (Kumar et al. 2018).

759

### 760 **Average nucleotide identity (ANIb) computation**

761 The average nucleotide identity between query and reference genomes was calculated by  
762 using the BLASTn algorithm (ANIb) (Goris et al. 2007). First, the query genome was  
763 fragmented into 1,000 consecutive parts, which were then each aligned to the reference  
764 genome sequence using BLASTn (v2.11.0+) (Altschul 1997). The ANIb score is the average  
765 value of the percentages of nucleotide identity of the query fragments with a positive match  
766 to the reference genome (alignment greater than 70 % with at least 30 % of nucleotide  
767 identity) (Goris et al. 2007). Because the ANIb score is not reciprocal (i.e. the ANIb score of  
768 genome A *versus* genome B may be slightly different from the ANIb score of genome B  
769 *versus* genome A), we used the average of the two reciprocal values as the final score.

770

## 771 **Core gene consensus order building**

772 The consensus order of core genes was determined from the analysis of the 52  
773 *Streptomyces* strains that harbor the most frequent *rrn* configuration, termed canonical ('*rrn*  
774 ABCDEF *dnaA*<sup>+</sup>'). A rank (from 1 to 1017) was assigned to each gene within each strain.  
775 The most frequent rank was attributed to each core gene. An ambiguity between ranks 498  
776 and 499 required a dedicated analysis of the most frequent gene order on the corresponding  
777 area. The scripts used to conduct this analysis are available in **Supplemental File 1**.

778

## 779 **The *rrn* nomenclature rules**

780 The core gene neighborhood of each *rrn* operon (nearest core gene and its previous and  
781 next core genes) was determined for all genomes in the panel (detailed in **Supplemental**  
782 **Fig. S2**). The order of the consensus core genes was used to determine the *rrn*  
783 neighborhood order described as 'sense'. If the order of the genes was in the other  
784 orientation, an asterisk was added to represent the 'antisense' orientation. The six most  
785 frequent *rrn* core gene environments were designated from 'A' to 'F', whereas the other *rrn*  
786 core gene environments were named from 'g' through 'k' in lower case with a number, to  
787 indicate their non-canonical nature. The same letter is kept when at least one core gene is in  
788 common between two *rrn* environments. Finally, the *dnaA* gene orientation was included in  
789 the nomenclature, as a proxy for the orientation of the replication origin. In this context,  
790 '*dnaA*<sup>+</sup>' and '*dnaA*<sup>-</sup>' refer to the sense (start codon located before the stop codon) or  
791 antisense orientation of the *dnaA* gene, respectively. Some sequences released from the  
792 databases were oriented in an inverted manner with respect to the consensus core order  
793 determined in this study. We conserved the orientation provided by the databases for the  
794 analyses presented in this paper, but considered the genome configuration in the appropriate  
795 orientation (e.g. '*rrn* F\*E\*D\*C\*B\*A\* *dnaA*<sup>-</sup>', considered as equivalent to '*rrn* ABCDEF  
796 *dnaA*<sup>+</sup>'). To decide whether a sequence from the database is in the same orientation as the  
797 reference consensus used in this study (*Streptomyces viridosporus* T7A ATCC 39115), it is  
798 necessary to consider the results of pairwise comparison presented in **Supplemental Figure**

799 **S1**: when the diagonal starts at the bottom left and ends at the top right, it means that the  
800 genome sequence available in the databases is oriented as in the consensus, and that the  
801 *rrn* configuration shown below each graph can be directly transposed onto the graph. If not,  
802 the sequence is in the opposite direction. In this case, the consensus should be reversed  
803 when transposed on the graph (e.g. '*rrn* ABCDEF *dnaA*+' becomes '*rrn* F\*E\*D\*C\*B\*A\* *dnaA*-  
804 ').

805

## 806 **Core gene-based identification of large genome rearrangements within the central** 807 **compartment**

808 The *Streptomyces viridosporus* T7A ATCC 39115 core genome was used as a reference in  
809 this analysis. The difference ('delta\_VIRO', in bp) between the position of the core genes in  
810 the central compartment of each strain and the reference strain was calculated, and then the  
811 difference between the 'delta\_VIRO' values of successive genes ('delta\_VIRO\_delta') within  
812 each strain. Positions for which the 'delta\_VIRO\_delta' values were greater than 200 kb were  
813 selected. Manual curation was performed based on pairwise comparisons of core genomes  
814 (**Supplemental Fig. S1 and S3**). Rearrangements identified in multiple strains sharing a  
815 common ancestor were considered only once, taking the average values of size and distance  
816 to the nearest *rrn* operons. In some cases, the exact position of the rearrangement was  
817 determined by comparison with a more closely related species (e.g. *S. koyakasensis* versus  
818 *S. albidoflavus*). In order to include only rearrangements whose identification was not  
819 ambiguous, three strains with too complex evolutionary scenario (*S. sp.* 11 1 2, *S. autolyticus*  
820 CGMCC0516 and *S. bingchenggensis* BCW 1) were excluded from this analysis. Thus, there  
821 were probably more rearrangements than proposed in the scenario (especially in the group  
822 'O'). All data are available in **Supplemental Table S5**.

823

## 824 **Modeling**

825 We fit linear regression models using the 'lm' function of R software (R Core Team 2021) to  
826 explore the predictability of the core region size ( $n = 127$ ) using as explanatory variables the

827 sizes and distances represented in **Fig.4A** as well as the number of *rrn* genes and the  
828 phylogenetic origin of the strains. We conducted both forward and backward regression  
829 approaches to select the best predictors. The script associated with this approach is detailed  
830 in the **Supplemental File 1**. The best fitting model according to Akaike Information Criterion  
831 (AIC) was checked visually using diagnostic plots (residuals vs. fitted values, and QQ plots to  
832 check normality) (**Supplemental Fig.S4**).

833

### 834 **GO enrichment analysis**

835 The GO enrichment analysis was performed on the CCC and TCC genes of *S. coelicolor*  
836 A3(2), which is the most studied and therefore annotated *Streptomyces* genome. The SCO  
837 and GO annotations of its core genome are detailed in the **Supplemental Table S9**. The  
838 g:Profiler g:GOst software (<https://biit.cs.ut.ee/gprofiler/gost>, version  
839 e105\_eg52\_p16\_e84549f) was used on line after uploading a GMT file corresponding to the  
840 *S. coelicolor* A3(2) complete GO annotation (**Supplemental File 2**).

841

### 842 **Transcriptome analyses**

843 RNA-seq data were retrieved from the NCBI Gene Expression Omnibus (GEO,  
844 <https://www.ncbi.nlm.nih.gov/geo/>) under the following accession codes: GSE162865 (*S.*  
845 *ambofaciens* ATCC 23877) (Virginia S. Lioy et al. 2021), GSE118597 (*S. avermitilis* MA  
846 4680) (Kim et al. 2020), GSE147644 (*S. bingchengensis* BCW1/BC-101-4) (P. Jin et al.  
847 2020), GSE69350 [*S. coelicolor* A3(2)] (Jeong et al. 2016), GSE128216 (*S. clavuligerus*  
848 ATCC 27064 2 3) (Kim et al. 2020), GSE97637 (*S. tsukubensis* NRRL 18488) (Kim et al.  
849 2020), GSE115439 (*S. venezuelae* ATCC 10712) (Gehrke et al. 2019). STAR software  
850 (Dobin et al. 2013) (v2.5.4) was used for mapping RNA-seq to the reference genome  
851 containing only one terminal inverted repeat (TIR). This avoids any biases with multiple  
852 mapping within the duplicated extremities of the genome (since the two TIR sequences are  
853 indistinguishable). We used the *featureCounts* program (Liao, Smyth, et Shi 2014) (v2.0.1) to  
854 quantify reads in the sense-orientation. SARTools (Statistical Analysis of RNA-Seq data

855 Tools, v1.6.3) DESeq2-based R pipeline (Love, Huber, et Anders 2014; Varet et al. 2016)  
856 was used with default parameters for systematic quality controls, normalization and detection  
857 of differentially expressed genes in each strain considered independently. The first time point  
858 was used as the reference condition. The DESeq2 counts were normalized on gene size  
859 (DESeq2 reads per kb) in each growth condition (**Supplemental Table 7**). Only protein-  
860 coding genes were considered to generate the data presented in **Fig. 6** and **Supplemental**  
861 **Fig. 8**.

862

### 863 **Statistical procedure and codes**

864 Statistical analyses were performed with R software (R Core Team 2021). The scripts used  
865 to annotate the genome (orthologous groups, core genome, etc.) and to calculate gene  
866 persistence and the ANIb are available on Github (Jnlorenzi 2022). The scripts used to  
867 conduct the data analyses are detailed in the **Supplemental File 1**.

868

### 869 **Data Access**

870 The **Supplemental Table 1** contains a precise description of all the genomes (including  
871 accession numbers, *rrn* configuration, as well as values for distances or numbers of genes of  
872 interest used in this study). The ANIb scores are available in the **Supplemental Table 2**. The  
873 species closest to the consensus/ancestor in terms of core gene order are listed in the  
874 **Supplemental Table 3**. The **Supplemental Table 4** provides the annotation of *rrn* operons  
875 in all genomes. The **Supplemental Table 5** lists the large rearrangements identified in the  
876 central compartment in 62 genomes. The complete (core and non-core) CDS annotation of  
877 all genomes is detailed in the **Supplemental Table 6**. The RNA-seq raw data used in this  
878 study are available on the NCBI Gene Expression Omnibus (GEO,  
879 <https://www.ncbi.nlm.nih.gov/geo/>) under the following accession codes: GSE162865 (*S.*  
880 *ambofaciens* ATCC 23877) (Virginia S. Liroy et al. 2021), GSE118597 (*S. avermitilis* MA  
881 4680) (Kim et al. 2020), GSE147644 (*S. bingchenggensis* BCW1/BC-101-4) (P. Jin et al.  
882 2020), GSE69350 [*S. coelicolor* A3(2)] (Jeong et al. 2016), GSE128216 (*S. clavuligerus*

883 ATCC 27064 2 3) (Kim et al. 2020), GSE97637 (*S. tsukubensis* NRRL 18488) (Kim et al.  
884 2020), GSE115439 (*S. venezuelae* ATCC 10712) (Gehrke et al. 2019). The RNA-seq data  
885 normalized by DESeq2 are available in the **Supplemental Table 7**. The **Supplemental**  
886 **Table 8** contains additional data on *rrn* operons, useful for easily reproducing some of the  
887 analyses described in the **Supplemental File 1**. The **Supplemental Table 9** contains the  
888 core genome SCO and GO annotations. The **Supplemental File 2** is a GMT file required to  
889 perform GO enrichment analysis using g:Profiler.

890

### 891 **Competing Interests**

892 The authors declare no competing interests.

893

### 894 **Author Contributions**

895 Supervision & design of the analyses: SBM; Bioinformatic analyses and script development:  
896 JNL, SBM; Writing – Original draft: SBM; Writing – Reviewing and Editing: all authors;  
897 Funding acquisition: JLP, SBM.

898

### 899 **Acknowledgments**

900 We acknowledge Hoda Jaffal for fruitful discussions and advice, Linda Sperling for  
901 proofreading the manuscript, and ANR (ANR-21-CE12-0044-01/STREPTOMICS) for funding.  
902 SBM acknowledges G. Lelandais, P. Poulain and B. Cosson for their valuable teaching and  
903 advice during the DUO degree. SBM also thanks C. Dillmann, T Mary-Huard and other  
904 teachers of the modeling course of the doctoral school ABIES.

905

### 906 **References**

907 Acevedo-Rocha, C. G., G. Fang, M. Schmidt, D. W. Ussery, et A. Danchin. 2013. « From essential to  
908 persistent genes: a functional approach to constructing synthetic life ». *Trends Genet* 29  
909 (5): 273-79. <https://doi.org/10.1016/j.tig.2012.11.001>.  
910 Algora-Gallardo, Lis, Jana K. Schniete, David R. Mark, Iain S. Hunter, et Paul R. Herron. 2021.  
911 « Bilateral Symmetry of Linear Streptomyces Chromosomes ». *Microbial Genomics* 7  
912 (11). <https://doi.org/10.1099/mgen.0.000692>.



- 913 Altschul, S. 1997. « Gapped BLAST and PSI-BLAST: a new generation of protein database search  
914 programs ». *Nucleic Acids Research* 25 (17): 3389-3402.  
915 <https://doi.org/10.1093/nar/25.17.3389>.
- 916 Arndt, David, Jason R. Grant, Ana Marcu, Tanvir Sajed, Allison Pon, Yongjie Liang, et David S.  
917 Wishart. 2016. « PHASTER: A Better, Faster Version of the PHAST Phage Search Tool ». *Nucleic Acids Research* 44 (W1): W16-21. <https://doi.org/10.1093/nar/gkw387>.
- 918 Aziz, Ramy K, Daniela Bartels, Aaron A Best, Matthew DeJongh, Terrence Disz, Robert A Edwards,  
919 Kevin Formsma, et al. 2008. « The RAST Server: Rapid Annotations Using Subsystems  
920 Technology ». *BMC Genomics* 9 (1): 75. <https://doi.org/10.1186/1471-2164-9-75>.
- 921 Bentley, S. D., K. F. Chater, A. M. Cerdeno-Tarraga, G. L. Challis, N. R. Thomson, K. D. James, D. E.  
922 Harris, et al. 2002. « Complete genome sequence of the model actinomycete  
923 *Streptomyces coelicolor* A3(2) ». *Nature* 417 (6885): 141-47.  
924 <https://doi.org/10.1038/417141a>.
- 925 Berdy, J. 2012. « Thoughts and facts about antibiotics: Where we are now and where we are  
926 heading ». *J Antibiot (Tokyo)* 65 (8): 441. <https://doi.org/10.1038/ja.2012.54>.
- 927 Blin, K., S. Shaw, K. Steinke, R. Villebro, N. Ziemert, S. Y. Lee, M. H. Medema, et T. Weber. 2019.  
928 « antiSMASH 5.0: updates to the secondary metabolite genome mining pipeline ». *Nucleic  
929 Acids Res* 47 (W1): W81-87. <https://doi.org/10.1093/nar/gkz310>.
- 930 Böhm, Kati, Giacomo Giacomelli, Andreas Schmidt, Axel Imhof, Romain Koszul, Martial Marbouty,  
931 et Marc Bramkamp. 2020. « Chromosome Organization by a Conserved Condensin-ParB  
932 System in the Actinobacterium *Corynebacterium Glutamicum* ». *Nature Communications*  
933 11 (1): 1485. <https://doi.org/10.1038/s41467-020-15238-4>.
- 934 Cabrera, Julio E., et Ding J. Jin. 2006. « Active Transcription of rRNA Operons Is a Driving Force  
935 for the Distribution of RNA Polymerase in Bacteria: Effect of Extrachromosomal Copies  
936 of *RrnB* on the In Vivo Localization of RNA Polymerase ». *Journal of Bacteriology* 188  
937 (11): 4007-14. <https://doi.org/10.1128/JB.01893-05>.
- 938 Caicedo-Montoya, Carlos, Monserrat Manzo-Ruiz, et Rigoberto Ríos-Estepa. 2021. « Pan-Genome  
939 of the Genus *Streptomyces* and Prioritization of Biosynthetic Gene Clusters With  
940 Potential to Produce Antibiotic Compounds ». *Frontiers in Microbiology* 12 (septembre):  
941 677558. <https://doi.org/10.3389/fmicb.2021.677558>.
- 942 Choulet, F., B. Aigle, A. Gallois, S. Mangenot, C. Gerbaud, C. Truong, F. X. Francou, et al. 2006.  
943 « Evolution of the terminal regions of the *Streptomyces* linear chromosome ». *Mol Biol  
944 Evol* 23 (12): 2361-69. <https://doi.org/10.1093/molbev/msl108>.
- 945 Dobin, A., C. A. Davis, F. Schlesinger, J. Drenkow, C. Zaleski, S. Jha, P. Batut, M. Chaisson, et T. R.  
946 Gingeras. 2013. « STAR: ultrafast universal RNA-seq aligner ». *Bioinformatics* 29 (1):  
947 15-21. <https://doi.org/10.1093/bioinformatics/bts635>.
- 948 Espejo, Romilio T., et Nicolás Plaza. 2018. « Multiple Ribosomal RNA Operons in Bacteria; Their  
949 Concerted Evolution and Potential Consequences on the Rate of Evolution of Their 16S  
950 rRNA ». *Frontiers in Microbiology* 9 (juin): 1232.  
951 <https://doi.org/10.3389/fmicb.2018.01232>.
- 952 Fang, G., N. Bhardwaj, R. Robilotto, et M. B. Gerstein. 2010. « Getting started in gene orthology  
953 and functional analysis ». *PLoS Comput Biol* 6 (3): e1000703.  
954 <https://doi.org/10.1371/journal.pcbi.1000703>.
- 955 Fischer, G., T. Wenner, B. Decaris, et P. Leblond. 1998. « Chromosomal arm replacement  
956 generates a high level of intraspecific polymorphism in the terminal inverted repeats of  
957 the linear chromosomal DNA of *Streptomyces ambofaciens* ». *Proc Natl Acad Sci U S A* 95  
958 (24): 14296-301.
- 959 Fleurier, Sebastien, Tanja Dapa, Olivier Tenailon, Ciarán Condon, et Ivan Matic. 2022. « rRNA  
960 Operon Multiplicity as a Bacterial Genome Stability Insurance Policy ». *Nucleic Acids  
961 Research*, mai, gkac332. <https://doi.org/10.1093/nar/gkac332>.
- 962 Gaal, Tamas, Benjamin P. Bratton, Patricia Sanchez-Vazquez, Alexander Sliwicki, Kristine  
963 Sliwicki, Andrew Vegal, Rachel Pannu, et Richard L. Gourse. 2016. « Colocalization of  
964 Distant Chromosomal Loci in Space in *E. Coli*: A Bacterial Nucleolus ». *Genes &  
965 Development* 30 (20): 2272-85. <https://doi.org/10.1101/gad.290312.116>.
- 966

- 967 Gehrke, E. J., X. Zhang, S. M. Pimentel-Elardo, A. R. Johnson, C. A. Rees, S. E. Jones, Hindra, et al.  
968 2019. « Silencing cryptic specialized metabolism in *Streptomyces* by the nucleoid-  
969 associated protein Lsr2 ». *Elife* 8 (juin). <https://doi.org/10.7554/eLife.47691>.
- 970 Gifford, Isaac, Aurko Dasgupta, et Jeffrey E Barrick. 2021. « Rates of Gene Conversions between  
971 *Escherichia Coli* Ribosomal Operons ». Édité par D Baltus. *G3 Genes/Genomes/Genetics* 11  
972 (2): jkaa002. <https://doi.org/10.1093/g3journal/jkaa002>.
- 973 Goris, Johan, Konstantinos T. Konstantinidis, Joel A. Klappenbach, Tom Coenye, Peter  
974 Vandamme, et James M. Tiedje. 2007. « DNA-DNA Hybridization Values and Their  
975 Relationship to Whole-Genome Sequence Similarities ». *International Journal of*  
976 *Systematic and Evolutionary Microbiology* 57 (1): 81-91.  
977 <https://doi.org/10.1099/ijs.0.64483-0>.
- 978 Hoff, G., C. Bertrand, E. Piotrowski, A. Thibessard, et P. Leblond. 2018. « Genome plasticity is  
979 governed by double strand break DNA repair in *Streptomyces* ». *Sci Rep* 8 (1): 5272.  
980 <https://doi.org/10.1038/s41598-018-23622-w>.
- 981 Hopwood, David A. 2006. « Soil to Genomics: The *Streptomyces* Chromosome ». *Annual Review of*  
982 *Genetics* 40: 1-23. <https://doi.org/10.1146/annurev.genet.40.110405.090639>.
- 983 Ikeda, H., J. Ishikawa, A. Hanamoto, M. Shinose, H. Kikuchi, T. Shiba, Y. Sakaki, M. Hattori, et S.  
984 Omura. 2003. « Complete genome sequence and comparative analysis of the industrial  
985 microorganism *Streptomyces avermitilis* ». *Nat Biotechnol* 21 (5): 526-31.  
986 <https://doi.org/10.1038/nbt820>.
- 987 Irvine, Sharon, Boyke Bunk, Hannah K. Bayes, Cathrin Spröer, James P. R. Connolly, Anne Six,  
988 Thomas J. Evans, Andrew J. Roe, Jörg Overmann, et Daniel Walker. 2019. « Genomic and  
989 Transcriptomic Characterization of *Pseudomonas Aeruginosa* Small Colony Variants  
990 Derived from a Chronic Infection Model ». *Microbial Genomics* 5 (4).  
991 <https://doi.org/10.1099/mgen.0.000262>.
- 992 Jeong, Y., J. N. Kim, M. W. Kim, G. Bucca, S. Cho, Y. J. Yoon, B. G. Kim, et al. 2016. « The dynamic  
993 transcriptional and translational landscape of the model antibiotic producer  
994 *Streptomyces coelicolor* A3(2) ». *Nat Commun* 7 (juin): 11605.  
995 <https://doi.org/10.1038/ncomms11605>.
- 996 Jin, Ding Jun, et Julio E. Cabrera. 2006. « Coupling the Distribution of RNA Polymerase to Global  
997 Gene Regulation and the Dynamic Structure of the Bacterial Nucleoid in *Escherichia*  
998 *Coli* ». *Journal of Structural Biology* 156 (2): 284-91.  
999 <https://doi.org/10.1016/j.jsb.2006.07.005>.
- 1000 Jin, Pinjiao, Shanshan Li, Yanyan Zhang, Liyang Chu, Hairong He, Zhuoxu Dong, et Wensheng  
1001 Xiang. 2020. « Mining and Fine-Tuning Sugar Uptake System for Titer Improvement of  
1002 Milbemycins in *Streptomyces Bingchenggensis* ». *Synthetic and Systems Biotechnology* 5  
1003 (3): 214-21. <https://doi.org/10.1016/j.synbio.2020.07.001>.
- 1004 Jnlorenzi. 2022. *jnlorenzi/rRNA\_Evolution\_2022: v1.1.1* (version v1.1.1). Zenodo.  
1005 <https://doi.org/10.5281/ZENODO.6417495>.
- 1006 Jumas-Bilak, Estelle, Sylvie Michaux-Charachon, Gisèle Bourg, David O'Callaghan, et Michel  
1007 Ramuz. 1998. « Differences in Chromosome Number and Genome Rearrangements in the  
1008 Genus *Brucella* ». *Molecular Microbiology* 27 (1): 99-106.  
1009 <https://doi.org/10.1046/j.1365-2958.1998.00661.x>.
- 1010 Karoonuthaisiri, Nitsara, David Weaver, Jianqiang Huang, Stanley N. Cohen, et Camilla M. Kao.  
1011 2005. « Regional Organization of Gene Expression in *Streptomyces Coelicolor* ». *Gene* 353  
1012 (1): 53-66. <https://doi.org/10.1016/j.gene.2005.03.042>.
- 1013 Katoh, K. 2002. « MAFFT: a novel method for rapid multiple sequence alignment based on fast  
1014 Fourier transform ». *Nucleic Acids Research* 30 (14): 3059-66.  
1015 <https://doi.org/10.1093/nar/gkf436>.
- 1016 Katoh, K., et D. M. Standley. 2013. « MAFFT Multiple Sequence Alignment Software Version 7:  
1017 Improvements in Performance and Usability ». *Molecular Biology and Evolution* 30 (4):  
1018 772-80. <https://doi.org/10.1093/molbev/mst010>.
- 1019 Kim, Woori, Soonkyu Hwang, Namil Lee, Yongjae Lee, Suhyung Cho, Bernhard Palsson, et Byung-  
1020 Kwan Cho. 2020. « Transcriptome and Translatome Profiles of *Streptomyces* Species in

- 1021 Different Growth Phases ». *Scientific Data* 7 (1): 138. [https://doi.org/10.1038/s41597-](https://doi.org/10.1038/s41597-020-0476-9)  
1022 020-0476-9.
- 1023 Klockgether, Jens, Antje Munder, Jens Neugebauer, Colin F. Davenport, Frauke Stanke, Karen D.  
1024 Larbig, Stephan Heeb, et al. 2010. « Genome Diversity of *Pseudomonas Aeruginosa* PAO1  
1025 Laboratory Strains ». *Journal of Bacteriology* 192 (4): 1113-21.  
1026 <https://doi.org/10.1128/JB.01515-09>.
- 1027 Kozlov, Alexey M, Diego Darriba, Tomáš Flouri, Benoit Morel, et Alexandros Stamatakis. 2019.  
1028 « RAxML-NG: A Fast, Scalable and User-Friendly Tool for Maximum Likelihood  
1029 Phylogenetic Inference ». Édité par Jonathan Wren. *Bioinformatics* 35 (21): 4453-55.  
1030 <https://doi.org/10.1093/bioinformatics/btz305>.
- 1031 Kumar, Sudhir, Glen Stecher, Michael Li, Christina Knyaz, et Koichiro Tamura. 2018. « MEGA X:  
1032 Molecular Evolutionary Genetics Analysis across Computing Platforms ». Édité par Fabia  
1033 Ursula Battistuzzi. *Molecular Biology and Evolution* 35 (6): 1547-49.  
1034 <https://doi.org/10.1093/molbev/msy096>.
- 1035 Le, T. B., et M. T. Laub. 2016. « Transcription rate and transcript length drive formation of  
1036 chromosomal interaction domain boundaries ». *EMBO J* 35 (14): 1582-95.  
1037 <https://doi.org/10.15252/emj.201593561>.
- 1038 Liao, Y., G. K. Smyth, et W. Shi. 2014. « featureCounts: an efficient general purpose program for  
1039 assigning sequence reads to genomic features ». *Bioinformatics* 30 (7): 923-30.  
1040 <https://doi.org/10.1093/bioinformatics/btt656>.
- 1041 Lieberman-Aiden, E., N. L. van Berkum, L. Williams, M. Imakaev, T. Ragoczy, A. Telling, I. Amit, et  
1042 al. 2009. « Comprehensive Mapping of Long-Range Interactions Reveals Folding  
1043 Principles of the Human Genome ». *Science* 326 (5950): 289-93.  
1044 <https://doi.org/10.1126/science.1181369>.
- 1045 Lim, K., Y. Furuta, et I. Kobayashi. 2012. « Large Variations in Bacterial Ribosomal RNA Genes ».   
1046 *Molecular Biology and Evolution* 29 (10): 2937-48.  
1047 <https://doi.org/10.1093/molbev/mss101>.
- 1048 Liou, V. S., A. Cournac, M. Marbouty, S. Duigou, J. Mozziconacci, O. Espeli, F. Boccard, et R. Koszul.  
1049 2018. « Multiscale Structuring of the E. coli Chromosome by Nucleoid-Associated and  
1050 Condensin Proteins ». *Cell* 172 (4): 771-783 e18.  
1051 <https://doi.org/10.1016/j.cell.2017.12.027>.
- 1052 Liou, Virginia S., Jean-Noël Lorenzi, Soumaya Najah, Thibault Poinignon, Hervé Leh, Corinne  
1053 Saulnier, Bertrand Aigle, et al. 2021. « Dynamics of the Compartmentalized *Streptomyces*  
1054 Chromosome during Metabolic Differentiation ». *Nature Communications* 12 (1): 5221.  
1055 <https://doi.org/10.1038/s41467-021-25462-1>.
- 1056 Lorenzi, Jean-Noël, Olivier Lespinet, Pierre Leblond, et Annabelle Thibessard. 2021.  
1057 « Subtelomeres Are Fast-Evolving Regions of the *Streptomyces* Linear Chromosome ».   
1058 *Microbial Genomics*, mars. <https://doi.org/10.1099/mgen.0.000525>.
- 1059 Love, Michael I, Wolfgang Huber, et Simon Anders. 2014. « Moderated Estimation of Fold Change  
1060 and Dispersion for RNA-Seq Data with DESeq2 ». *Genome Biology* 15 (12): 550.  
1061 <https://doi.org/10.1186/s13059-014-0550-8>.
- 1062 Marbouty, M., A. Le Gall, D. I. Cattoni, A. Cournac, A. Koh, J. B. Fiche, J. Mozziconacci, H. Murray, R.  
1063 Koszul, et M. Nollmann. 2015. « Condensin- and Replication-Mediated Bacterial  
1064 Chromosome Folding and Origin Condensation Revealed by Hi-C and Super-resolution  
1065 Imaging ». *Mol Cell* 59 (4): 588-602. <https://doi.org/10.1016/j.molcel.2015.07.020>.
- 1066 Mata Martin, Carmen, Zhe Sun, Yan Ning Zhou, et Ding Jun Jin. 2018. « Extrachromosomal  
1067 Nucleolus-Like Compartmentalization by a Plasmid-Borne Ribosomal RNA Operon and  
1068 Its Role in Nucleoid Compaction ». *Frontiers in Microbiology* 9 (juin): 1115.  
1069 <https://doi.org/10.3389/fmicb.2018.01115>.
- 1070 McDonald, Bradon R., et Cameron R. Currie. 2017. « Lateral Gene Transfer Dynamics in the  
1071 Ancient Bacterial Genus *Streptomyces* ». Édité par Paul Keim. *MBio* 8 (3).  
1072 <https://doi.org/10.1128/mBio.00644-17>.
- 1073 Omura, S., H. Ikeda, J. Ishikawa, A. Hanamoto, C. Takahashi, M. Shinose, Y. Takahashi, et al. 2001.  
1074 « Genome Sequence of an Industrial Microorganism *Streptomyces Avermitilis*: Deducing

- 1075 the Ability of Producing Secondary Metabolites ». *Proceedings of the National Academy of*  
1076 *Sciences of the United States of America* 98 (21): 12215-20.  
1077 <https://doi.org/10.1073/pnas.211433198>.
- 1078 Overbeek, Ross, Michael Fonstein, Mark D'Souza, Gordon D. Pusch, et Natalia Maltsev. 1999.  
1079 « The Use of Gene Clusters to Infer Functional Coupling ». *Proceedings of the National*  
1080 *Academy of Sciences* 96 (6): 2896-2901. <https://doi.org/10.1073/pnas.96.6.2896>.
- 1081 Overbeek, Ross, Robert Olson, Gordon D. Pusch, Gary J. Olsen, James J. Davis, Terry Disz, Robert  
1082 A. Edwards, et al. 2014. « The SEED and the Rapid Annotation of Microbial Genomes  
1083 Using Subsystems Technology (RAST) ». *Nucleic Acids Research* 42 (D1): D206-14.  
1084 <https://doi.org/10.1093/nar/gkt1226>.
- 1085 R Core Team, Team. 2021. « R: A language and environment for statistical computing ». Édité par  
1086 Vienna R Foundation for Statistical Computing Austria. URL <https://www.R-project.org/>.
- 1087 Redenbach, M., H. M. Kieser, D. Denapaite, A. Eichner, J. Cullum, H. Kinashi, et D. A. Hopwood.  
1088 1996. « A Set of Ordered Cosmids and a Detailed Genetic and Physical Map for the 8 Mb  
1089 *Streptomyces Coelicolor* A3(2) Chromosome ». *Molecular Microbiology* 21 (1): 77-96.  
1090 <https://doi.org/10.1046/j.1365-2958.1996.6191336.x>.
- 1091 Richter, Michael, et Ramon Rosselló-Móra. 2009. « Shifting the Genomic Gold Standard for the  
1092 Prokaryotic Species Definition ». *Proceedings of the National Academy of Sciences* 106  
1093 (45): 19126-31. <https://doi.org/10.1073/pnas.0906412106>.
- 1094 Roller, Benjamin R. K., Steven F. Stoddard, et Thomas M. Schmidt. 2016. « Exploiting RRNA  
1095 Operon Copy Number to Investigate Bacterial Reproductive Strategies ». *Nature*  
1096 *Microbiology* 1 (11): 16160. <https://doi.org/10.1038/nmicrobiol.2016.160>.
- 1097 Sato, Mitsuharu, et Kentaro Miyazaki. 2017. « Phylogenetic Network Analysis Revealed the  
1098 Occurrence of Horizontal Gene Transfer of 16S rRNA in the Genus *Enterobacter* ».  
1099 *Frontiers in Microbiology* 8 (novembre): 2225.  
1100 <https://doi.org/10.3389/fmicb.2017.02225>.
- 1101 Scholz, Scott A., Rucheng Diao, Michael B. Wolfe, Elayne M. Fivenson, Xiaoxia Nina Lin, et Peter L.  
1102 Freddolino. 2019. « High-Resolution Mapping of the *Escherichia Coli* Chromosome  
1103 Reveals Positions of High and Low Transcription ». *Cell Systems* 8 (3): 212-225.e9.  
1104 <https://doi.org/10.1016/j.cels.2019.02.004>.
- 1105 Sinha, Anurag Kumar, Adeline Durand, Jean-Michel Desfontaines, Ielyzaveta Iurchenko, H el ene  
1106 Auger, David R. F. Leach, Fran ois-Xavier Barre, et B enedicte Michel. 2017. « Division-  
1107 Induced DNA Double Strand Breaks in the Chromosome Terminus Region of *Escherichia*  
1108 *Coli* Lacking RecBCD DNA Repair Enzyme ». Édité par Nancy Maizels. *PLOS Genetics* 13  
1109 (10): e1006895. <https://doi.org/10.1371/journal.pgen.1006895>.
- 1110 Stevenson, Bradley S., et Thomas M. Schmidt. 2004. « Life History Implications of RRNA Gene  
1111 Copy Number in *Escherichia Coli* ». *Applied and Environmental Microbiology* 70 (11):  
1112 6670-77. <https://doi.org/10.1128/AEM.70.11.6670-6677.2004>.
- 1113 Szafran, Marcin J., Tomasz Ma lecki, Agnieszka Strza ka, Katarzyna Pawlikiewicz, Julia Du awa,  
1114 Anna Zarek, Agnieszka Kois-Ostrowska, Kim C. Findlay, Tung B. K. Le, et Dagmara  
1115 Jakimowicz. 2021. « Spatial Rearrangement of the *Streptomyces Venezuelae* Linear  
1116 Chromosome during Sporogenic Development ». *Nature Communications* 12 (1): 5222.  
1117 <https://doi.org/10.1038/s41467-021-25461-2>.
- 1118 Takemata, Naomichi, et Stephen D. Bell. 2021. « Multi-Scale Architecture of Archaeal  
1119 Chromosomes ». *Molecular Cell* 81 (3): 473-487.e6.  
1120 <https://doi.org/10.1016/j.molcel.2020.12.001>.
- 1121 Tatusov, Roman L., Eugene V. Koonin, et David J. Lipman. 1997. « A Genomic Perspective on  
1122 Protein Families ». *Science* 278 (5338): 631-37.  
1123 <https://doi.org/10.1126/science.278.5338.631>.
- 1124 Tidjani, A. R., J. N. Lorenzi, M. Toussaint, E. van Dijk, D. Naquin, O. Lespinet, C. Bontemps, et P.  
1125 Leblond. 2019. « Massive Gene Flux Drives Genome Diversity between Sympatric  
1126 *Streptomyces* Conspecifics ». *MBio* 10 (5). <https://doi.org/10.1128/mBio.01533-19>.

- 1127 Varet, H., L. Brillet-Gueguen, J. Y. Coppee, et M. A. Dillies. 2016. « SARTools: A DESeq2- and  
1128 EdgeR-Based R Pipeline for Comprehensive Differential Analysis of RNA-Seq Data ». *PLoS*  
1129 *One* 11 (6): e0157022. <https://doi.org/10.1371/journal.pone.0157022>.  
1130 Wang, Xindan, Tung B. K. Le, Bryan R. Lajoie, Job Dekker, Michael T. Laub, et David Z. Rudner.  
1131 2015. « Condensin Promotes the Juxtaposition of DNA Flanking Its Loading Site in  
1132 *Bacillus Subtilis* ». *Genes & Development* 29 (15): 1661-75.  
1133 <https://doi.org/10.1101/gad.265876.115>.  
1134 Weng, Xiaoli, Christopher H. Bohrer, Kelsey Bettridge, Arvin Cesar Lagda, Cedric Cagliero, Ding  
1135 Jun Jin, et Jie Xiao. 2019. « Spatial Organization of RNA Polymerase and Its Relationship  
1136 with Transcription in *Escherichia Coli* ». *Proceedings of the National Academy of Sciences*  
1137 116 (40): 20115-23. <https://doi.org/10.1073/pnas.1903968116>.  
1138 Zhang, Zheren, Chao Du, Frédérique de Barsy, Michael Liem, Apostolos Liakopoulos, Gilles P. van  
1139 Wezel, Young H. Choi, Dennis Claessen, et Daniel E. Rozen. 2020. « Antibiotic Production  
1140 in *Streptomyces* Is Organized by a Division of Labor through Terminal Genomic  
1141 Differentiation ». *Science Advances* 6 (3): eaay5781.  
1142 <https://doi.org/10.1126/sciadv.aay5781>.  
1143
